1 **AirSurf-Lettuce: an aerial image analysis platform for ultra-scale**  
2 **field phenotyping and precision agriculture using computer vision**  
3 **and deep learning**

4  
5 **Authors**

6 Alan Bauer<sup>1,2,3,+</sup>, Alan.Bauer@earlham.ac.uk, orcid: 0000-0002-7443-1511

7 Aaron George Bostrom<sup>1,+</sup>, aaron.bostrom@earlham.ac.uk, 0000-0002-7300-6038

8 Joshua Ball<sup>1</sup>, Joshua.Ball@earlham.ac.uk, orcid: 0000-0003-4840-3768

9 Christopher Applegate<sup>1</sup>, Christopher.Applegate@earlham.ac.uk

10 Tao Cheng<sup>4</sup>, tcheng@njau.edu.cn, orcid: 0000-0002-4184-0730

11 Stephen Laycock<sup>3</sup>, S.Laycock@uea.ac.uk, orcid: 0000-0002-7724-1369

12 Sergio Moreno Rojas<sup>5</sup>, sergio.morenorojas@GS-Growers.com

13 Jacob Kirwan<sup>5,\*</sup>, Jacob.Kirwan@GS-Growers.com

14 Ji Zhou<sup>1,2,3,\*</sup>, Ji.Zhou@njau.edu.cn, Ji.Zhou@earlham.ac.uk, orcid: 0000-0002-5752-5524

15

16 <sup>1</sup>Earlham Institute, Norwich Research Park, Norwich, NR4 7UZ, UK

17 <sup>2</sup>Plant Phenomics Research Center, China-UK Plant Phenomics Research Centre, Nanjing  
18 Agricultural University, Nanjing 210095, Jiangsu, China

19 <sup>3</sup>School of Computing Sciences, University of East Anglia, Norwich Research Park, Norwich, NR4  
20 7TJ

21 <sup>4</sup>National Engineering and Technology Center for Information Agriculture, MARA Key Laboratory  
22 for Crop System Analysis and Decision Making, Jiangsu Key Laboratory for Information Agriculture,  
23 Nanjing Agricultural University, Nanjing 210095, Jiangsu, China

24 <sup>5</sup>G's Growers Limited, Ely, Cambridgeshire, CB7 5TZ

25

26 <sup>+</sup>Joint first author      <sup>\*</sup>Corresponding author

27

28 **Corresponding authors**

29 Ji.Zhou@njau.edu.cn and Ji.Zhou@earlham.ac.uk; Jacob.Kirwan@GS-Fresh.com

30

31 **Abstract**

32 Aerial imagery is regularly used by farmers and growers to monitor crops during the growing season.  
33 To extract meaningful phenotypic information from large-scale aerial images collected regularly from  
34 the field, high-throughput analytic solutions are required, which not only produce high-quality  
35 measures of key crop traits, but also support agricultural practitioners to make reliable management  
36 decisions of their crops. Here, we report *AirSurf-Lettuce*, an automated and open-source aerial image  
37 analysis platform that combines modern computer vision, up-to-date machine learning, and modular  
38 software engineering to measure yield-related phenotypes of millions of lettuces across the field.  
39 Utilising ultra-large normalized difference vegetation index (NDVI) images acquired by fixed-wing  
40 light aircrafts together with a deep-learning classifier trained with over 100,000 labelled lettuce  
41 signals, the platform is capable of scoring and categorising iceberg lettuces with high accuracy  
42 (>98%). Furthermore, novel analysis functions have been developed to map lettuce size distribution in  
43 the field, based on which global positioning system (GPS) tagged harvest regions can be derived to  
44 enable growers and farmers' precise harvest strategies and marketability estimates before the harvest.

45

46 **Keywords**

47 AirSurf; lettuce; ultra-scale field phenotyping; deep learning; image analysis; precision agriculture

48

## 49 **Introduction**

50 As an important source of vitamins, minerals, and trace elements, leaf vegetables play crucial roles  
51 in human nutrition<sup>1</sup>. Lettuce (*Lactuca sativa* L., a plant of the Asteraceae family), one of the most  
52 common staple vegetable foods, has a wide range of tastes, textures, and shapes that satisfy diverse  
53 customer needs<sup>2,3</sup>. Recent research indicates that lettuce consumption has positive effects on the  
54 reduction of cardiovascular disease and chronic conditions, because it provides nutrients such as  
55 vitamin A, *Beta-carotene*, folate, and iron content to support human growth and health<sup>4,5</sup>. While  
56 lettuce is an important and nutritional crop, fluctuating environments can increase the fragility of its  
57 production<sup>6</sup>. For example, the bad weather in Spain in early 2017 led to retail prices for lettuce  
58 products to nearly triple in UK supermarkets<sup>7</sup>. Severe weather not only can cause supply shortage, but  
59 also affects the crop quality. According to studies on lettuce growth and development<sup>8-10</sup>, at newly  
60 planted phase (i.e. from cotyledons unfolded to three true leaves stage), young crops require cool and  
61 damp weather to develop into high-quality products after transplanting from greenhouse to the fields;  
62 whereas lettuce leaves can rapidly become bitter and inedible if the plant growth is accelerated by  
63 ambient temperature at the head maturity phase (i.e. before flowering). Because of the dynamic nature  
64 of lettuce production, the actual yield of lettuces in commercial operations is around 70-80% of the  
65 planted quantity<sup>11,12</sup>. To ensure consistency of supply and quality, it is important for growers and  
66 farmers to closely monitor lettuce growth and development, so that prompt and reliable agricultural  
67 practices can be arranged under today's fluctuating agricultural conditions<sup>13</sup>.

68 Commercially, lettuce production offers an attractive economic profitability in comparison to many  
69 other Agri-Food businesses<sup>14,15</sup>. To date, lettuce-related businesses are worth billions of dollars and  
70 employ hundreds of thousands of permanent and seasonal workers globally. According to the Food  
71 and Agriculture Organisation of the United Nations<sup>16</sup>, European vegetable growers alone produced  
72 2.95 million tonnes of lettuce (and chicory) in 2016, a total annual value of €2.5 billion. Spain, the  
73 largest lettuce producer in Europe, is exporting approximately €420 million worth of lettuce products  
74 every year; Germany, France and the UK are the three largest markets for lettuce consumption in  
75 Europe, with a combined import of €350 million annually<sup>17</sup>. To serve diverse consumer tastes as well

76 as improve the actual yield of lettuces, lettuce breeders are constantly introducing new varieties to the  
77 market, from the dense head (i.e. iceberg type) to the notched or frilly leaf varieties<sup>18,19</sup>.

78 Further down the fresh produce supply chain, the planning and efficiency of many essential Agri-  
79 Food activities are largely dependent on the maturity date and marketability of different sizes and  
80 quality of crops<sup>20</sup>. Logistics, trading, and marketing need to be organised several weeks before the  
81 harvest<sup>21</sup>; moreover, the booking and reservation of lettuce distribution, agricultural equipment, and  
82 commercial plans with retails are often determined between H1 (soft and spongy head) and H3  
83 (mature and compact head) stages. So, crop can be harvested at the right time, with maximised  
84 yield<sup>22,23</sup>. To reliably measure and estimate potential yield (e.g. the number of lettuce heads) and  
85 associated crop quality (e.g. lettuce size categories) for better marketing and supply chain  
86 management, growers and farmers are continuously seeking new technologies to assist them with  
87 better and more precise crop management decisions<sup>24,25</sup>.

88 As a relative newcomer to life sciences, machine learning (ML) related techniques use statistics and  
89 sparse representations to progressively build computational procedures to accomplish specific tasks  
90 such as data classification, feature selection, clustering, and predictive modelling<sup>26,27</sup>. Although the  
91 unfamiliarity with ML often prevents plant researchers from effectively employing ML and its related  
92 technology in biological studies<sup>28-30</sup>, many cases indicate that ML is the key to success in addressing a  
93 variety of data-driven challenges in life sciences, if appropriately labelled training data<sup>31</sup>, suitable  
94 learning algorithms<sup>32</sup>, and well-defined missions can be arranged. Some of the cases are: (1) the  
95 analysis of big genomic data for annotation, assembly, and gene regulatory networks<sup>31</sup>, (2) the  
96 classification of DNA and protein sequences for genetic and genomic studies<sup>33</sup>, and (3) the prediction  
97 of genome and phenome patterns based on high-dimensional feature datasets<sup>34</sup>.

98 In this article, we present a cross-disciplinary approach that develops a new analytic software tool to  
99 perform automated ultra-scale field phenotyping of iceberg lettuce. Our research and development  
100 (R&D) activities integrates ultra-scale normalized difference vegetation index (NDVI) aerial imagery,  
101 modern computer vision, state-of-the-art deep learning (i.e. convolutional neural networks, CNNs),  
102 supervised machine learning, modular software engineering, and commercial lettuce production into  
103 an open-source image analysis platform called *AirSurf-Lettuce* (AirSurf-L). The platform is capable

104 of performing phenotypic analysis of millions of lettuces across the field. A CNN model trained with  
105 over 100,000 labelled lettuce signals has been embedded in AirSurf-L to quantify lettuce heads and  
106 their plantation layout using ultra-large NDVI images collected by a fixed-wing light aircraft.  
107 Unsupervised ML algorithms were used to classify lettuce heads into three size categories (i.e. small,  
108 medium and large). To connect analysis results with marketability and crop management decisions, a  
109 novel function has been developed to connect global positioning system (GPS) information with the  
110 lettuce size distribution map, based on which a GPS-tagged harvest map was produced to enable  
111 efficient and precise harvesting strategies for growers and farmers to increase marketable yield. The  
112 analysis results generated by AirSurf-L show a strong correlation between machine counting and  
113 specialist scoring. We are therefore confident that our work is promising in assisting vegetable  
114 growers and farmers with their precision agriculture management activities. Together with recent  
115 advances in unmanned aerial vehicles (UAV) technologies, ground-based remote sensors, and ML-  
116 based modelling, AirSurf-L could have great significance to improve the fresh vegetable crop  
117 production, distributing and logistics activities before the harvest. Furthermore, with additional  
118 training data, necessary testing and validation, we believe that the analysis platform can be expanded  
119 relatively easily to incorporate other crop species such as wheat and rice for ultra-scale aerial crop  
120 phenotyping.

121

## 122 **Results**

### 123 *NDVI aerial imaging and data acquisition*

124 The ultra-large aerial NDVI imagery was acquired routinely (i.e. four-five times per season) using a  
125 fixed-wing light aircraft operated by G's Growers, the second largest vegetable grower in the UK.  
126 The flying route and the imaging protocol were designed to facilitate cross-site crop layout  
127 assessment, yield prediction (based on vegetation indices), and disease monitoring (Fig. 1A), which  
128 has been described previously<sup>35</sup>. In this study, we used a series of collected ultra-large NDVI images  
129 (1.5-2GB per image) at 3cm ground sample distance (GSD) spatial resolution, collecting iceberg  
130 lettuce signals between H1 and H2 stages (i.e. moderate compact and crushable head), before lettuce

131 leaves were largely overlapped. Experimental fields were located in Cambridgeshire UK, ranging  
132 from 10 to 20 hectares, with between 800,000 and 1.6 million lettuce heads in a single field. A field  
133 planted with around 1 million lettuce heads (coloured light blue in Fig. 1B) was used in the following  
134 sections to explain the analysis workflow of AirSurf-L. A high-level manual yield counting was  
135 conducted by the grower's field specialists during the harvest, which was used to verify and improve  
136 the AirSurf-L platform. Also, lettuces in subsections randomly selected from experimental fields were  
137 scored manually by laboratory technicians, which were also used as training data for the CNN model.

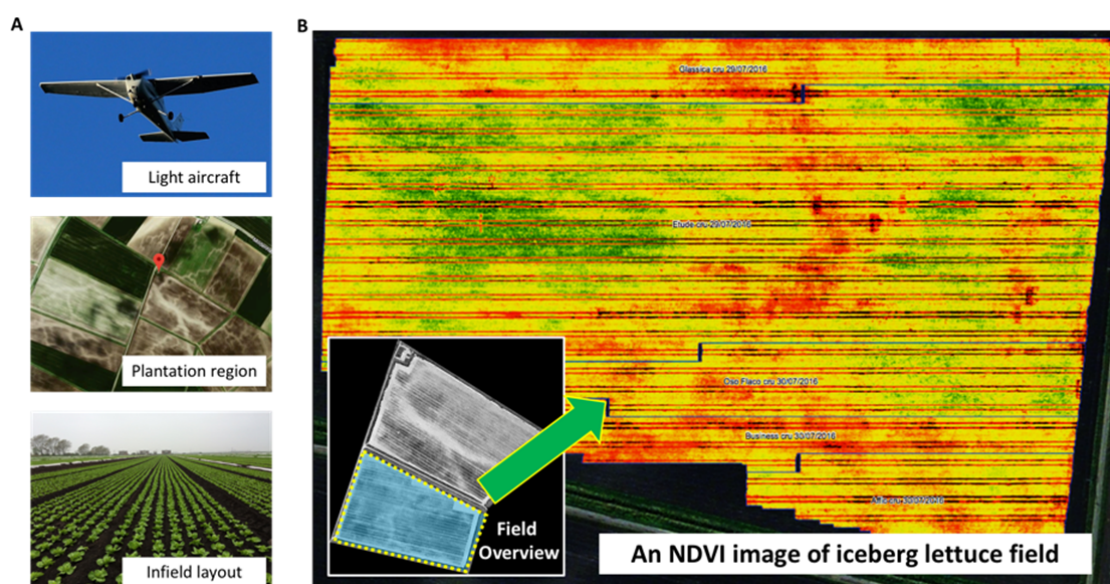

138  
139 **Figure 1: Ultra-large NDVI aerial imaging accomplished routinely through a fixed-wing light aircraft**  
140 **operated by G's Growers.**

141 (A) The flying route and aerial imaging were designed to facilitate cross-site crop layout assessment and yield  
142 prediction. (B) A series of ultra-large NDVI images at 3cm GSD spatial resolution were acquired to record 0.8-  
143 1.6 million lettuce heads per field, at H1 and H2 stages.

144

#### 145 *The analysis workflow of AirSurf-L*

146 The analysis of yield-related phenotypes was based on NDVI signals of iceberg lettuces across the  
147 field. Figure 2 shows a high-level analysis workflow of AirSurf-L, which consists of five steps: data  
148 input, image calibration and pre-processing, ML-based traits analyses, results visualisation, and  
149 quantifications of yield-related phenotypes. *Step 1* accepts raw NDVI images as gray-level imagery

150 datasets. As pixels with extremely high NDVI signals usually have overflowed intensity values (i.e.  
151 black pixels in Fig. 2A), a pre-processing step (*Step 2*) is designed to calibrate raw NDVI images, so  
152 that intensity distribution can be normalised and overflowing pixels can be corrected. In this step, an  
153 algorithm called contrast limited adaptive histogram equalization (CLAHE)<sup>36</sup> is applied to increase  
154 the contrast between the foreground (i.e. lettuces) and background (i.e. soils) in a given NDVI image  
155 (Fig. 2B). [Additional File 1](#) provides pseudo code and explanations of this step.

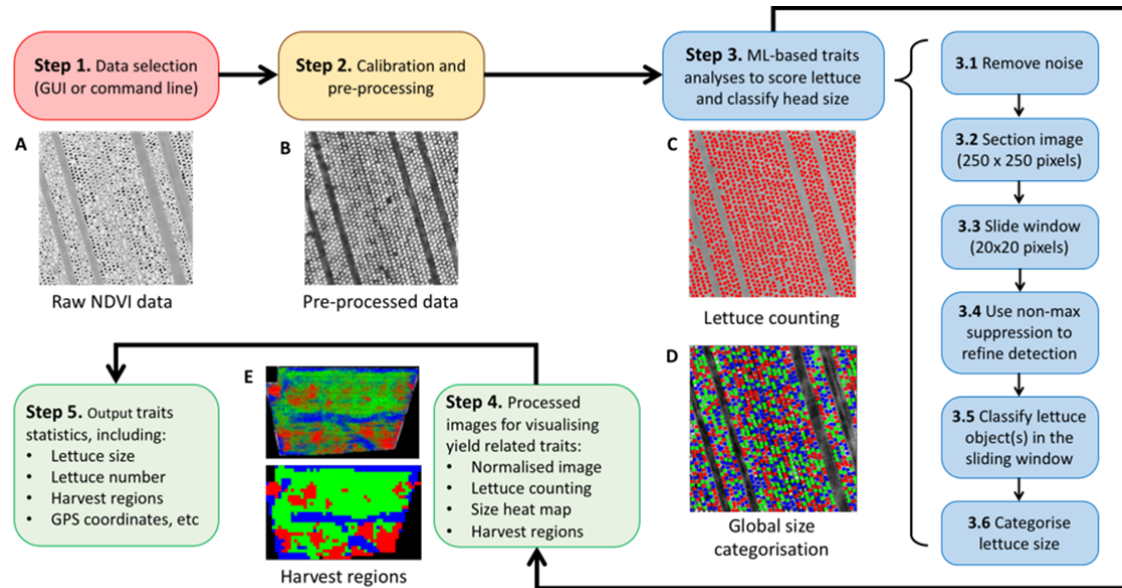

156

157 **Figure 2: A high-level analysis workflow of AirSurf-Lettuce.**

158 (A) Step 1 accepts raw NDVI images as input imagery data (pixels with extremely high NDVI signals are  
159 overflowed). (B) Step 2 pre-processes the raw NDVI images to calibrate intensity distribution and correct  
160 overflowing pixels. (C&D) Step 3 carries out ML-based traits analyses to quantify lettuce number and classify  
161 head size across a given NDVI image. (E) Steps 4&5 visualise and export statistics of the traits analyses  
162 detection, including yield-related phenotypes such as lettuce counting, size distribution, and harvest regions, and  
163 associated GPS coordinates.

164

165 *Step 3* carries out ML-based traits analyses that quantify lettuce number (Fig. 2C) as well as classify  
166 head size (Fig. 2D). It includes six steps: removing noise signals, partitioning a given image into  
167 sections (250 x 250 pixels) for local analysis, producing a sliding window (20 x 20 pixels) to traverse  
168 within a sectioned image, using non-max suppression to detect lettuces, and classifying recognised



169 lettuces into three size categorises (i.e. small, medium and large). The analysis result is visualised in  
170 *Step 4*, where lettuce counting, size distribution map, and GPS-tagged harvest regions are saved as  
171 processed images ([Fig. 2E](#)). At the final step (*Step 5*), statistics of yield-related traits are saved in a  
172 comma-separated values (CSV) file, including lettuce counts per field, lettuce size distribution, lettuce  
173 number and size measures within GPS-based grids, harvest regions, and their associated GPS  
174 coordinates ([Additional File 2](#)). To enable users to carry out the above analysis workflow, a GUI-  
175 based software application has been developed ([Supplementary Fig. 1](#)).

176

#### 177 *Data construction for model training and testing*

178 To generate a sound training and testing dataset for ML-based image analysis, we randomly selected  
179 dozens of patches of a given field and manually labelled each lettuce in the patch with a red dot  
180 ([Supplementary Fig. 2](#)). Then, each dot is identified by a bounding box, which is then used to build  
181 the learning model. A training dataset with over 100,000 20x20-pixel labelled images has been  
182 created, amongst which 50% are lettuces and the remaining are background signals such as soil, edges  
183 of the field, and other non-lettuce objects. Following a standard CNN segmentation approach<sup>37</sup>, we  
184 designed a sliding window function to go through a given image to divide foreground and background  
185 signals, splitting lettuce and non-lettuce objects. Training and testing datasets are equally balanced.  
186 Validation sets are used alongside training sets to verify the performance of the model as well as to  
187 prevent overfitting in model training, which is also an important step to allow us to fine-tune  
188 hyperparameters of different learning layers<sup>38</sup>.

189

#### 190 *Neural network architecture*

191 Similar to AlexNet<sup>39</sup>, a CNN-based learning architecture was established using the labelled datasets.  
192 [Figure 3A](#) demonstrates the architecture of the CNN model, including (1) a convolutional (Conv2D)  
193 layer with 32 filters and a 3x3 kernel, with a rectified linear unit (ReLU) as the activation function,  
194 and batch normalisation to accelerate the learning process to enable higher learning rates<sup>40</sup>; (2) the  
195 same block is then repeated together with a max pooling layer to down-sample input using a 2x2

196 kernel based on the assumption that useful input features could be contained in sub-regions; (3) after  
197 that, a second convolutional block is constructed, consisting of a Conv2D layer with 64 filters, a 3x3  
198 kernel, a ReLU activation, and batch normalisation; (4) finally, this block is repeated, followed by  
199 another max pooling layer (with a 2x2 kernel) to complete the learning procedure. After the  
200 convolutional layers, layers are connected to a fully connected layer of size 512, which is followed by  
201 a dropout layer with a 50% chance. To complete the learning architecture, a binary output generates  
202 the probability of whether a given bounding box (20x20 pixels) contains a lettuce signal. If the  
203 probability equals or is close to 1.0 (i.e. 100%), it indicates that it is highly likely that the bounding  
204 box contains a complete lettuce head (Fig. 3B). The above architecture is commonly applied to  
205 vision-based object detection problems<sup>41</sup>. The training and validation accuracy and loss curves are  
206 reported in Figure 3C, showing that the model converges in only 10 epochs. To avoid overfitting, the  
207 stopping criterion was designed to ensure that the validation accuracy is higher than the training  
208 accuracy. By doing this, we can ensure the generalisation of the model. When training the CNN  
209 model, the labelled data was also divided equally into train and validation sets.

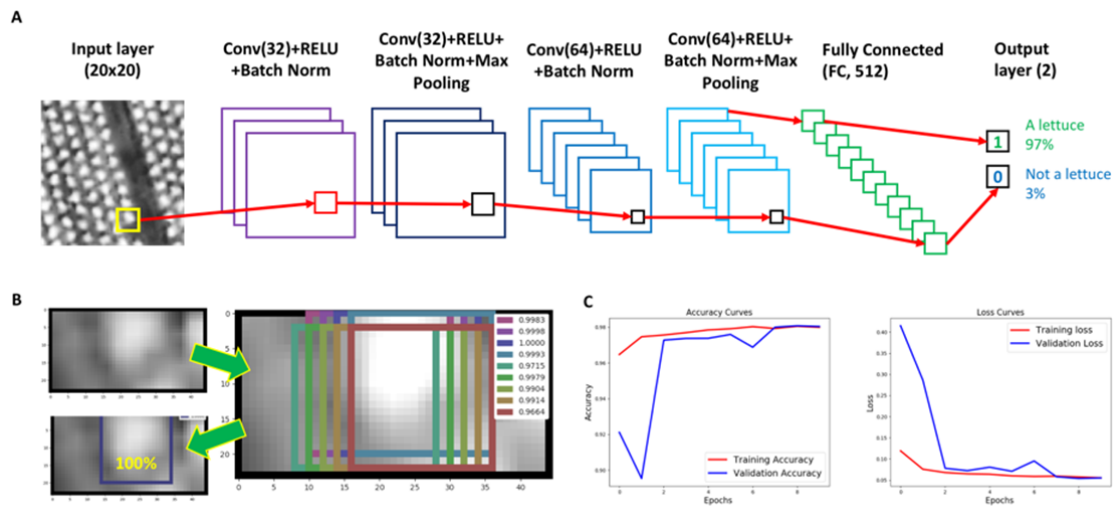

210

211 **Figure 3: A CNN-based learning architecture established for lettuce counting.**

212 (A) The architecture of the trained CNN model, which generates a binary output representing the probability of  
213 whether a yellow bounding box contains a lettuce signal. (B) If the probability is close to 1.0, it indicates that it  
214 is highly likely that the bounding box encloses a lettuce. (C) The training and validation accuracy and loss  
215 curves of the model.

216

217 *Phenotypic analysis of lettuce heads*

218 After a CNN classifier was trained, we used it to recognise and classify lettuce signals in ultra-large  
219 NDVI images. The six-step approach discussed before (Fig. 2) is followed. However, during the  
220 testing and implementation, we found that the CNN classifier could wrongly score lettuces as a lettuce  
221 head is extremely tiny in an orthomosaic image (e.g. 11,330x6,600 pixels for a 7-hectare field when  
222 GSD is 3cm, which can contain over half million lettuce heads). To resolve this issue, we have  
223 designed a two-step approach: (1) sectioning the whole image into many 250x250 pixels sub-images,  
224 and (2) using a fix-sized bounding-box (20x20 pixels) as a sliding window (with a stepping parameter  
225 of 5 pixels to reduce the sliding calculation) to prune the detected lettuce objects in each sub-image.

226 Another reason that caused the CNN classifier's wrong detection is overlapped lettuce objects. Even  
227 in a sub-image, overlapped lettuces could be detected repeatedly by the classifier. Hence, we  
228 employed a non-maximum suppression (NMS) algorithm<sup>42</sup> to rectify the detection result. NMS uses  
229 probabilities to order the detected lettuce objects in a sub-image. After the sliding window function is  
230 performed and many small patches have been identified in a sub-image, the NMS algorithm computes  
231 an overlap coefficient to determine how to retain these patches. As lettuces are relatively well-spaced,  
232 bounding boxes surrounding a complete lettuce signal will be retained, whereas partially covered  
233 signals will be removed. To select the best overlap parameter for the NMS, a gradient descent method  
234 is formulated. [Additional File 3](#) explains the NMS algorithm and its implementation in AirSurf-L.

235

236 *Results improvement and size categorisation*

237 Initially, the training data selected was chosen randomly across the field. Using the data, AirSurf-L  
238 can capture a broad range of sizes and orientations of lettuces with varying intensities. However,  
239 when applying the initial CNN model, it failed to recognise lettuces in very bright regions and overly  
240 count lettuces in very dark regions (e.g. approximately 50,000 lettuces were wrongly detected in the  
241 one-million-head field, Fig. 4A). To resolve this issue, we enhanced the training datasets by manually  
242 labelling an additional 500 lettuce signals within very bright or very dark regions. Then, newly

243 labelled data was inserted into the training datasets to retrain the model through the online-learning  
244 approach<sup>43</sup>. The improved model (available on our GitHub repository, see Availability of supporting  
245 data) was tested on different experimental fields again and has dramatically enhanced the detection  
246 result (Fig. 4B).

247 Identified lettuces are individually analysed to determine their associated size category. The size  
248 classification is based on intensity and contrast values enclosed by the 20x20 bounding boxes, which  
249 is computed using the dot product of the histogram of pixel intensities and a weighted vector towards  
250 more pixel-based contrast values (see Methods). The assumption of this design is that higher NDVI  
251 signals likely correlate with higher vegetation indices<sup>44</sup>, which indicates bigger lettuce heads. The  
252 categorisation result of all lettuce heads is clustered into three size groups. Each lettuce is then  
253 coloured with a predefined colour code (i.e. small is blue, medium is green, and large is red, see Fig.  
254 4C).

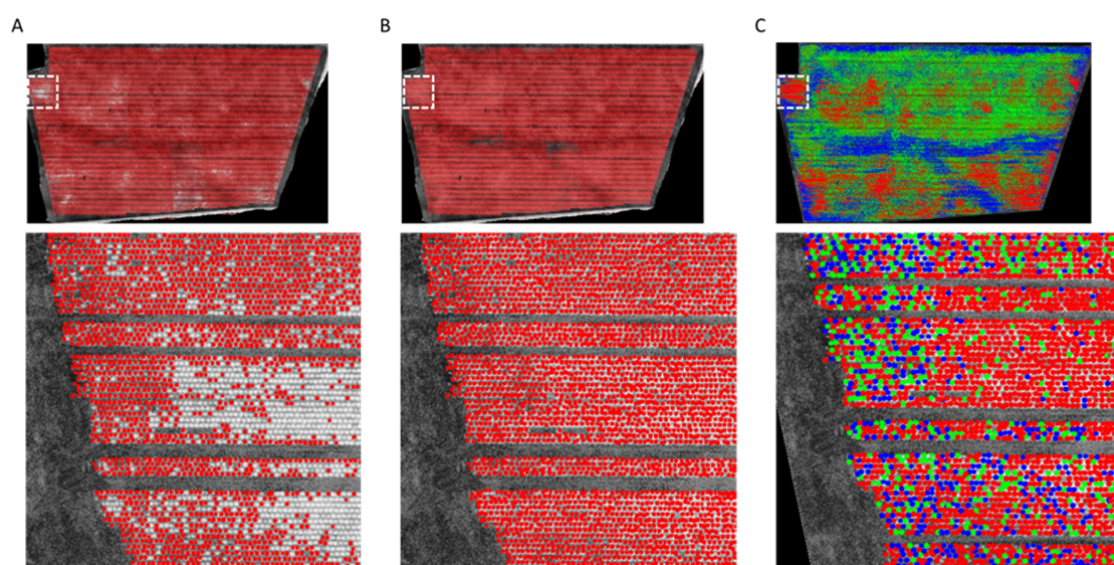

256 **Figure 4: The improved results of the CNN model and the size classification of lettuce heads.**

257 (A) Wrongly detected lettuces in very bright regions and overly counted lettuces in very dark regions, in a one-  
258 million-head field. (B) Enhanced training datasets to retrain the model using the online-learning approach,  
259 which led to much better detection results. (C) A predefined colour code (small is coloured blue, medium is  
260 coloured green, and large is coloured red) is assigned to each recognised lettuce head across the field.

261

262 *GPS- tagged harvest regions*

263 The final phase of the phenotypic analysis is to define harvest regions based on colour-coded  
264 lettuces. Using the size distribution map (Fig. 5A), the field is firstly segmented into many small grids  
265 based on the optimal GPS resolution determined by the altitude of aerial imagery (3cm GSD, in our  
266 case) as well as the size of the harvester machinery used by the grower. After dividing the field into  
267 thousands of grids (Fig. 5B), GPS coordinates of each grid are recorded and each grid is coloured  
268 with the most representative lettuce size category. By combining all coloured grids, a GPS-tagged  
269 harvest map is produced, representing harvest regions of the field (Fig. 5C). The harvest map is then  
270 used for designing harvesting strategies such as guiding a harvester to collect desired sized lettuces or  
271 arranging logistics based on the lettuce number and size counting. To facilitate agricultural practices,  
272 a result file (in .csv format, Additional File 2) is generated by AirSurf-L at the end of the analysis,  
273 containing information of each harvest region, the associated GPS location, lettuce size, lettuce counts,  
274 and the location in the field. To satisfy different needs for dissimilar requirements, the size of GPS-  
275 based harvest grids can be modified manually in the AirSurf-L software.

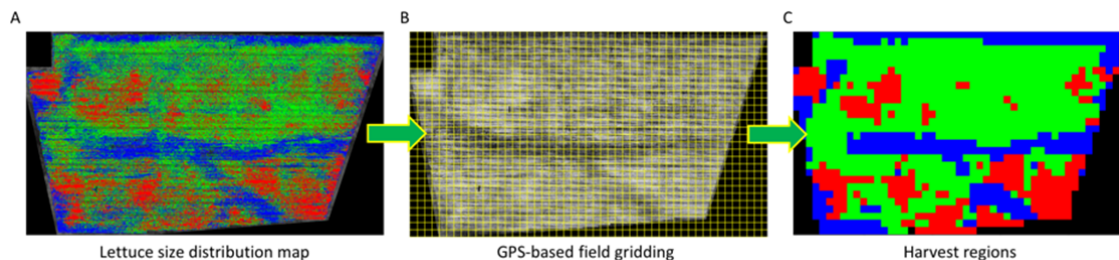

276

277 **Figure 5: A GPS-based harvest map based on lettuce size classification.**

278 (A) A colour-coded lettuce size distribution map. (B) The field is segmented into thousands of grids based on  
279 the optimal GPS resolution and the size of the harvester machinery. (C) Grids are coloured with the most  
280 representative lettuce size category across the image, representing harvest regions of the whole field.

281

282 Figure 6 uses Python-based 3D Matplotlib library<sup>45</sup> to show the GPS-tagged harvest map. When  
283 AirSurf-L reads an NDVI image, it first computes the number of lettuce heads and associated size  
284 categories on the image (Fig. 6A). Then, by 3D visualising the relationship of GPS-based field grids,  
285 the number of lettuces in the grid, and the representative size category (Fig. 6B), a dynamic 3D bar

286 chart is generated to present lettuce number using the z axis, infield layout (both columns and rows)  
287 using both x and y axes, and the representative lettuce size using the predefined colours (Fig. 6C).  
288 Through the 3D plot, users can zoom into one sub-region of the field to check detailed yield-related  
289 traits within each infield grid and plan harvesting strategies accordingly.

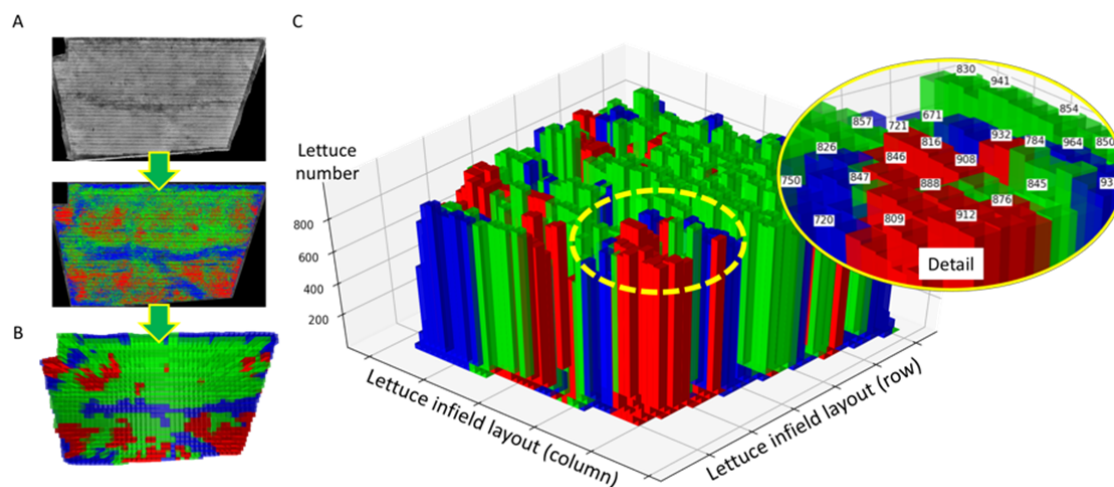

290

291 **Figure 6: 3D visualisation of lettuce harvest regions.**

292 (A) AirSurf-L reads an NDVI image and exports a lettuce size distribution map. (B) 3D visualising GPS-based  
293 field grids to represent the number of lettuces, representative size categories. (C) A dynamic 3D bar chart is  
294 generated to present the relationship between lettuce number, infield layout, and the representative lettuce size.

295

296 *Validation of the platform*

297 To verify AirSurf-L and the generalisation of the learning model, we have applied the platform to  
298 count and classify lettuce heads in three unseen experimental fields in Cambridgeshire, UK (Figs. 7A-  
299 C). These fields contain around 700,000-1,500,000 lettuces and are located in different sites around  
300 the county. Traits such as the number of lettuces per field and associated size categorisation quantified  
301 by the platform were compared with industrial estimates, showing a highly correlated phenotypic  
302 analysis (<5% difference). Besides the field-level comparison, we also randomly selected different  
303 sizes of subsections in a given experiment field to evaluate AirSurf-L more precisely. We split these  
304 subsections into two sets (i.e. 36 small regions and 21 large regions), where the small regions have  
305 less than 400 lettuces and the large ones contain greater than 900 lettuces heads. After that, laboratory

306 technicians manually counted lettuce heads within these regions. The correlation between the manual  
307 and AirSurf-L counting shows that, for the small regions, the difference between the human and  
308 automatic counting is approximately 2%; for the large regions, the average difference is around 0.8%.  
309 [Supplementary Figure 3](#) reports the strong correlations ( $R^2 = 0.98$ ) between human and automatic  
310 counting in both regions.

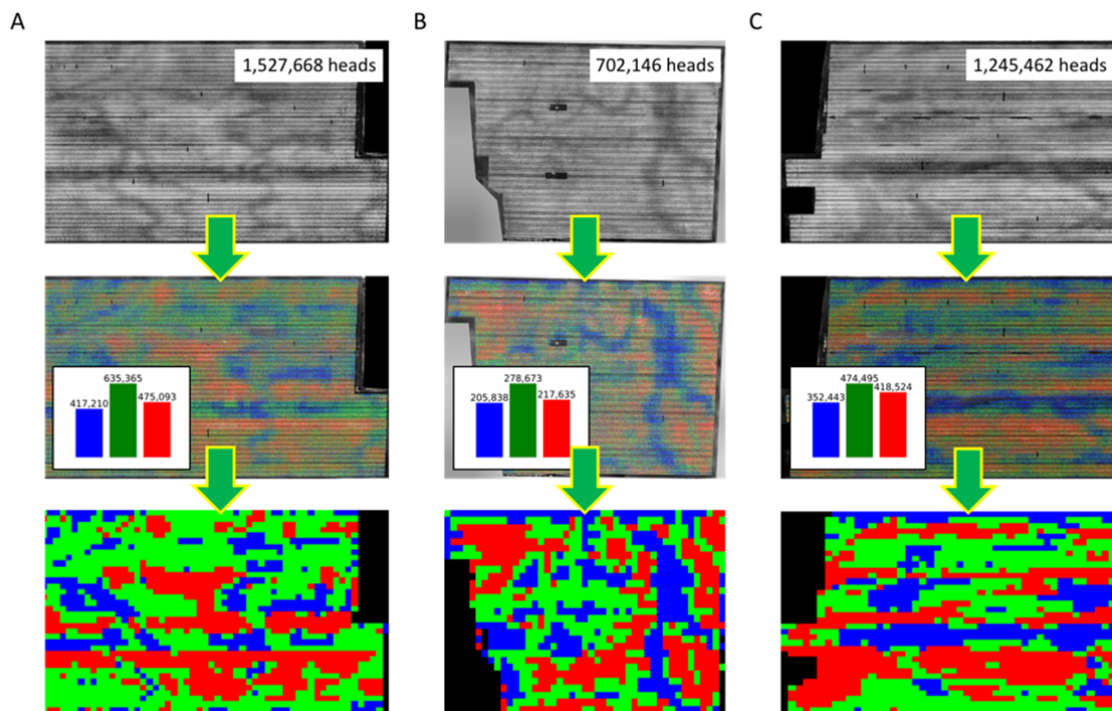

312 **Figure 7: Applying AirSurf-Lettuce to count and classify millions of lettuce heads in three plantation**  
313 **fields across the Cambridgeshire, UK.**

314 (A-C) AirSurf-Lettuce is applied to count and classify millions of lettuce heads in three plantation fields in the  
315 Cambridgeshire, UK.

316

## 317 **Discussion**

318 Traditionally, measuring infield crops on a large scale is very time-consuming and labour-intensive.  
319 It often requires destructive techniques, potentially error-prone manual counting, or estimates of traits  
320 that are key to yield production or crop quality<sup>46</sup>. Recent advances in machine learning (including  
321 deep learning) and computer vision (CV) based techniques have led to an explosion of phenotypic  
322 analysis that is rapidly improving our abilities to mine phenotypic information from large and

323 complicated phenotyping datasets<sup>47-49</sup>. New data-driven analytic approaches are also changing plant  
324 phenomics research – collecting big data (i.e. phenotyping) is no longer the bottleneck, instead how to  
325 extract biologically relevant information (i.e. phenotypic analysis) from big data has become the  
326 current challenge<sup>50-52</sup>. Hence, along with the development of aerial imaging and remote sensing  
327 technologies, it has become increasingly noticeable that the integration of scalable data collection,  
328 high-throughput phenotypic analysis, and predictive modelling are key to crop research and precision  
329 agriculture<sup>52-54</sup>.

330

### 331 *A combined research effort*

332 AirSurf-L addresses a specific challenge in ultra-scale field phenotyping and precision agricultural  
333 practices through combining aerial NDVI imagery, CV, ML, and modular software engineering, with  
334 commercial lettuce production. The software platform automates the measurement of millions of  
335 lettuces in the field and our industrial partner has contributed key ideas of how to connect research-  
336 based phenotypic analysis with real-world agriculture problems. As a cross-disciplinary project, our  
337 project collaborators came from different backgrounds and hence many efforts were made on  
338 understanding the requirements at the project initiation phase. Also, the academia-industry project  
339 setting required a more agile R&D progress, because computational technologies and industrial  
340 requirements were constantly changing while the project was still ongoing. From the project  
341 development, one of the most valuable lessons we learned is that requirements and implementation  
342 are unlikely to be clarified at the beginning and more efforts shall be made towards mutual  
343 understanding. Similar to the case reported previously<sup>55</sup>, all project parties need to be adaptive with  
344 changeable requirements due to the dynamic nature of such a project; additionally, a successful  
345 integration of project stakeholders requires all parties to manage expectation, mutual trust, and, more  
346 importantly, clear communication channels.

347



348 *Machine learning in plant phenomics*

349 Another aim of this work is to further ML- and CV-based software solutions in plant phenomics.  
350 High-throughput plant phenotyping is a fast-growing research domain, covering many disciplines,  
351 from plant breeding, cultivation, remote sensing, to computing sciences<sup>56,57</sup>. The modulated software  
352 development allows us to apply different open-source learning architectures<sup>58</sup> (e.g. Scikit-Learn and  
353 the TensorFlow frameworks) and CV algorithms<sup>59,60</sup> (e.g. OpenCV and Scikit-Image libraries), when  
354 implementing AirSurf-L. Notably, it is worth pointing out that ML is *not* a silver bullet for phenotypic  
355 analysis, because: (1) learning algorithms could perform badly if training datasets are not well-  
356 labelled; and, (2) although ML performs well in segmentation and classification if target objects are  
357 well-defined, there is still a big gap between object recognition and traits analyses. Meaningful  
358 phenotypic analysis not only requires sufficient biological understanding to define target traits in a  
359 logical manner, but also needs bespoke algorithms to engineer features so traits can be soundly  
360 extracted. Hence, biological questions, CV, data analysis, and software engineering shall be  
361 considered collectively with ML techniques when resolving plant phenomics problems.

362

363 *Limitations of the platform*

364 Besides the high-accurate phenotypic analysis results presented in this article, there are still  
365 limitations of the platform need to be considered: (1) AirSurf-L has been tested with top-view iceberg  
366 lettuces mainly at H1 and H2 stages, which means that analysis error could increase if there are too  
367 many overlaps between lettuce heads, e.g. from H3 stage onwards. (2) As AirSurf-L has only been  
368 tested with NDVI imagery, it is therefore important to add new functions to the platform to  
369 incorporate other vegetation indices measured through multi- and hyper-spectrum imaging sensors. (3)  
370 As precision agriculture management decisions are normally based on imagery, soil and climate  
371 conditions, AirSurf's results will be more reliable, if soil and climate data can be integrated in the  
372 analysis. (4) The method was tested and validated in lettuce fields in a number of geographic  
373 locations following a standard aerial imaging procedure, data collected from different sites via varied

374 aerial imaging strategies (e.g. different angles, altitudes and GSD) could improve the soundness and  
375 compatibility of the platform.

376

377 *Prospects for crop research and precision agriculture*

378 The open-source software development opens up the potential for computational biologists to  
379 include new learning models and analytic functions for other staple crops such as wheat and rice. For  
380 example, the plant density of wheat is closely related to the yield due to its influences on the  
381 allocation of water, light and fertilisers; however, it is not feasible to quantify the plant density solely  
382 using ground-based RGB imagery<sup>61</sup>. Hence, utilising the ultra-scale NDVI aerial imagery and object  
383 recognition methods embedded in AirSurf-L, it is likely possible to quantify wheat plants at the  
384 emergence stage in different farming sites, which not only can benefit the assessment of sowing  
385 performance, emergence rate, and plant distribution, but also will help breeders and cultivation  
386 researchers make early predictions of the grain yield of different wheat genotypes in field experiments.

387 From a precision agriculture perspective, monitoring individual plant such as a lettuce head will  
388 enable accurate monitoring of crops during key growth stages across a plantation site. It can provide  
389 growers with the real number of crops in the field, based on which yield for harvest availability and  
390 management plans can be quantified instead of estimated. The calculation of infield crops will also  
391 lead to more accurate agricultural inputs, facilitating automated variable-rate application of fertiliser,  
392 weed control, and pesticides through tractor software system with a precise crop distribution map<sup>62</sup>.  
393 More interestingly, the close monitoring of key yield-related traits can also be used to guide farmers  
394 and growers to reduce variability of agrichemical applications and irrigation in different fields,  
395 leading to increased harvest yield and better operating profit margin<sup>63</sup>. Finally, the AirSurf-L  
396 approach fits in the cost-effective category in precision agriculture. The platform utilises existing  
397 aerial imagery data routinely performed by the growers and farmers, which means that no extra data  
398 collection cost is required by this approach and hence the adoptability of the technology, an important  
399 factor for new Agri-Tech solutions to be accepted by the Agri-Food sector<sup>53</sup>.

400

## 401 **Conclusions**

402 *AirSurf-Lettuce* automatically measures infield iceberg lettuces using ultra-scale NDVI aerial images,  
403 with a focus on yield-related traits such as lettuce number, size categories, field size distribution, and  
404 GPS-tagged harvest regions. The analysis results are close to the manual and industrial counting and  
405 can be used to improve existing crop measures and estimates. By monitoring millions of lettuces in  
406 the field, we demonstrate the significant value of *AirSurf-L* in ultra-scale field phenotyping, lettuce  
407 size distribution mapping, precise harvest strategies, and marketability estimates before harvesting.  
408 We believe that our algorithm design, software implementation, lessons learned from applying ML-  
409 and CV-based algorithms, and the academic-industrial R&D activities will be highly valuable for  
410 future plant phenomics research projects that are destined to be dynamic and cross-disciplinary.  
411 Finally, with continuous development work, we are confident that the analytic platform is likely to  
412 support the Agri-Food sector with a smarter and more precise crop surveillance approach of vegetable  
413 crops and therefore lead to better precision agriculture management decisions.

414

## 415 **Methods**

### 416 *Ultra-large field NDVI imagery and experimental fields*

417 The NDVI imaging sensor used is an industrial standard camera described previously<sup>35</sup>. The aerial  
418 imaging was carried out by a 'Sky Arrow' light aircraft, the lightest weight class (Very Light Aircraft,  
419 VLA) of any commercial aircraft that is allowed for commercial work. The VLA let the pilot to fly  
420 with very little fuel, less than an average farm vehicle while driving around the crops. Using VLA at  
421 1000 feet (around 305 metres) in the sky, vast areas can be covered at a flight speed 180-200 km/hour.  
422 The NDVI sensor can gather ultra-large crop imagery datasets at very low operating costs, as the  
423 VLA can carry 45 kilograms of payload to cover four or five fields in a single flight. This aerial  
424 imaging approach can also be used to understand the spectral changes associated with key disease  
425 conditions. The NDVI lettuce signals used in this study were captured at H1 or H2 growth stage  
426 (moderately compact and crushable head, when lettuce leaves are not largely overlapping with  
427 neighbours). The experimental fields are operated by G's Growers near Ely UK, ranging from 10 to

428 20 hectares with at least 0.5 million lettuce heads in a single field. A rough manual yield estimate was  
429 produced by specialists during the harvest, which were used for testing and improving AirSurf-L.

430

#### 431 *Dataset preparation*

432 To generate a sound dataset for machine learning-based image analysis, we randomly selected 60  
433 patches of the field of varying sizes, each containing between 300 and 1,000 individual lettuce heads,  
434 and manually labelled each lettuce in the selected patches. Each labelled lettuce is extracted as a  
435 20x20 pixel image representing a single lettuce head. We then used these images, along with images  
436 that did not correspond to a lettuce head, to train a CNN classifier to recognize and separate potential  
437 lettuces from the ultra-large field images. The pixels contained within the potential lettuces were used  
438 for further phenotypic analysis of lettuce size. To format the manually labelled dataset for building the  
439 model, we created another training dataset with over 100,000 20x20 pixel images, among which 50%  
440 are lettuces and 50% are background signals. The background images were selected using regions  
441 other than the labelled lettuces across the field together with a non-overlapping sliding window  
442 function to extract background patches. These images are then split into two equally balanced training  
443 and validation sets.

444

#### 445 *Construction of deep neural network architecture*

446 We built our deep neural network based on the architecture of AlexNet. We used a shallower  
447 architecture as opposed to AlexNet and other modern deeper architectures for several reasons: (1) the  
448 size of our dataset is relatively small for deep learning studies, where larger and deeper networks tend  
449 to require bigger training datasets; (2) additionally, ours is only a binary classification problem as  
450 opposed to the ImageNet classification task; (3) larger neural networks often require more time to  
451 train, which can be slower to execute and not feasible to train the model without specialised hardware  
452 such as GPUs. In our case, we wanted a relatively simple, but powerful model that could execute in a  
453 broad range of environments and in a timely manner.

454 Like AlexNet, we used rectified linear units (ReLU) as our activation function, which is now a  
455 common standard in CNNs. This is because ReLU reduces the vanishing gradient problem<sup>19</sup>. After  
456 each convolutional layer, we also perform batch normalisation. This reduces the covariance shift,  
457 which helps ensure that the model generalises well and the network converges faster. Finally, we  
458 included two max pooling layers to reduce the problem into smaller samples. Other architectures  
459 might use more max pooling layers, but our input images were segmented and hence quite small. In  
460 order to avoid too much information loss from the training procedure, we trained the CNN on our  
461 datasets until the validation accuracy was greater than the training accuracy. The training and  
462 validation accuracy and loss are reported in [Figure 3](#), where it is shown that the model converged in  
463 only 10 epochs. More importantly, to avoid over fitting, the stopping criterion was set for when the  
464 validation accuracy is higher than the train accuracy.

465

#### 466 *Size categorisation*

467 After AirSurf-L identifies a list of square pixel patches containing single lettuces, it is important to  
468 perform automatic unsupervised size categorisation. Lettuce sizing in this work is split into three size  
469 categories: small, medium and large; however, the method can be easily changed to classify more size  
470 categories. The pixel regions are extracted from the image and then NDVI values are put into bins  
471 with similar pixel values. Originally, the histogram included 10 bins that are evenly spread across the  
472 value range, i.e. 0-255. However, treating all pixel values equally performed poorly in practice. We  
473 therefore included two important aspects in the size categorisation. Firstly, the lower NDVI  
474 surrounding value does not determine the actual size of the lettuce; secondly, the higher NDVI values  
475 are much more important in indicating size. As such, we created a geometric pattern of cut-off values  
476 for each bin. These were: 64, 128, 160, 192, 208, 224, 232, 240, 244, 248, 250, 252, 253, and 254.  
477 With these cut-off values, most of the background pixels were captured in the first two bins, with  
478 increasing granularity as the values approached the maximum of 255.

479 Having transformed the pixel regions into a series of histogram count vectors, we were able to  
480 compare regions and cluster the patches into groups. The count vectors are grouped into three distinct

481 sizes by using k-means clustering with k set to three. They are sorted into size order through  
482 calculating the dot product between the weight vector and the cluster centres count vector. These  
483 sorted values then determine which cluster corresponds to which size, and subsequently, applies to  
484 each lettuce. Three colours are used to indicate size categories: blue for small, green for medium, and  
485 red for large.

486

#### 487 *Common Pitfalls*

488 The CNN trained on a set of approximately 100,000 images. Despite the reported training and  
489 validation accuracies being quite high, in practice the network performed poorly because it could not  
490 distinguish lettuces in patches where most lettuces appear particularly bright. As the initial training  
491 datasets were chosen randomly, not enough representative samples from extreme regions were  
492 selected during the training. Without sufficient training data, the network was undercounting by 5% in  
493 large fields. To solve this problem, we manually labelled further 500 lettuces and added them to the  
494 training dataset. The neural network was retrained and converged faster than the previous iteration.  
495 The algorithm was updated with the new model with improved results. The above training issue could  
496 be a common pitfall for many deep-learning analytic solutions, because key features were constructed  
497 by learning algorithms instead of engineered. Many learning models were vulnerable when facing up  
498 to totally undefined datasets.

499

#### 500 **Availability and requirements**

501 Project name: AirSurf-Lettuce with G's Growers

502 Project home page: <https://github.com/Crop-Phenomics-Group/Airsurf-Lettuce>

503 Operating system(s): platform independent

504 Programming language: Python 3

505 Requirements: Packaged for both Mac and Windows

506 License: BSD-3-Clause available at <https://opensource.org/licenses/BSD-3-Clause>

507

508 **Abbreviations**

509 Comma-separated values (CSV), computer vision (CV), convolutional neural networks (CNNs), deep  
510 learning (DL), global positioning system (GPS), ground sample distance (GSD), machine learning  
511 (ML), non-maximum suppression algorithm (NMS), normalized difference vegetation index (NDVI),  
512 rectified linear units (ReLU), the United Kingdom (UK), and Unmanned Aerial Vehicles (UAVs).

513

514 **Availability of supporting data**

515 The datasets supporting the results presented here is available at [https://github.com/Crop-Phenomics-](https://github.com/Crop-Phenomics-Group/Airsurf-Lettuce/releases)  
516 [Group/Airsurf-Lettuce/releases](https://github.com/Crop-Phenomics-Group/Airsurf-Lettuce/releases). Source code and other supporting data are also openly available in  
517 the GitHub repository.

518

519 **Author contributions**

520 J.Z., A.B., A.G.B. and J.K. wrote the manuscript, S.M.R. performed the NDVI imaging. J.K. provided  
521 harvest information and biological expertise. J.Z., A.G.B., and C.A. designed the analysis algorithms.  
522 A.B., A.G.B., C.A. and J.Z. developed and implemented the core algorithms. A.B. and A.G.B. built  
523 the deep learning models for AirSurf-L. J.B. packaged the GUI executables. J.Z., A.B., A.G.B., C.A.,  
524 S.L. and J.B. tested the software. J.Z., A.G.B and A.B. performed the data analysis. All authors read  
525 and approved the final manuscript.

526

527 **Funding**

528 JZ and JB were partially funded by UKRI Biotechnology and Biological Sciences Research Council's  
529 (BBSRC) Designing Future Wheat Cross-institute Strategic Programme (BB/P016855/1) to Graham  
530 Moore, BBS/E/T/000PR9785 to JZ. AGB and JB were partially supported by the Core Strategic  
531 Programme Grant (BB/CSP17270/1) at the Earlham Institute. JB and CA were also partially  
532 supported by G's Growers industrial fund awarded to JZ. AB was supported by the Newton UK-  
533 China Agri-Tech Network+ Grant (GP131JZ1G) awarded to JZ.

534

535 **Acknowledgements**

536 The authors would like to thank all members of the Zhou laboratory at EI and Nanjing Agricultural  
537 University for fruitful discussions and cross-country collaborations. We thank researchers at John  
538 Innes Centre and UEA for constructive suggestions. We gratefully acknowledge the support of  
539 NVIDIA Corporation with the award of the Quadro GPU used for this research.

540

541 **Competing interests**

542 The authors declare no competing financial interests.

543

544 **References**

- 545 1 Gubbi J, Buyya R, Marusic S, Palaniswami M. Internet of Things (IoT): A Vision, Architectural  
546 Elements, and Future Directions. *Futur Gener Comput Syst* 2013; **29**: 1645–1660.
- 547 2 Mou B. Mutations in lettuce improvement. *Int J Plant Genomics* 2011; **2011**: 1–7.
- 548 3 Landry BS, Kesseli R V, Farrara B, Michelmore RW. A Genetic Map of Lettuce (*Lactuca sativa* L.)  
549 with Restriction Fragment Length Polymorphism, Isozyme, Disease Resistance and Morphological  
550 Markers. *Genetics* 1987; **116**: 331–337.
- 551 4 Büchner FL, Bueno-de-Mesquita HB, Ros MM *et al.* Variety in fruit and vegetable consumption and the  
552 risk of lung cancer in the European Prospective Investigation into Cancer and Nutrition. *Cancer*  
553 *Epidemiol Biomarkers Prev* 2010; **19**: 2278–2286.
- 554 5 Koudela M, Petříková K. Nutrients content and yield in selected cultivars of leaf lettuce (*Lactuca sauva*  
555 *L. var crispa*). *Hortic Sci* 2008; **35**: 99–106.
- 556 6 Tei F, Scaife A, Aikman D. Growth of lettuce, onion, and red beet. 1. Growth analysis, light  
557 interception, and radiation use efficiency. *Ann Bot* 1996; **78**: 633–643.
- 558 7 BBC. Iceberg lettuces and broccoli rationed as vegetable crisis hits supermarkets. BBC News. 2017; :  
559 1–3.
- 560 8 De Pinheiro Henriques AR, Marcelis LFM. Regulation of growth at steady-state nitrogen nutrition in  
561 lettuce (*Lactuca sativa* L.): Interactive effects of nitrogen and irradiance. *Ann Bot* 2000; **86**: 1073–1080.
- 562 9 Jie H, Lee Sing Kong. Growth and photosynthetic characteristics of lettuce (*Lactuca sativa* L.) under  
563 fluctuating hot ambient temperatures with the manipulation of cool root-zone temperature. *J Plant*



- 564            *Physiol* 1998; **152**: 387–391.
- 565    10    Johkan M, Shoji K, Goto F, Hashida S nosuke, Yoshihara T. Blue light-emitting diode light irradiation  
566            of seedlings improves seedling quality and growth after transplanting in red leaf lettuce. *HortScience*  
567            2010; **45**: 1809–1814.
- 568    11    Ogbodo EN, Okorie PO, Utobo EB. Growth and Yield of Lettuce (*Lactuca sativa* L .) At Abakaliki  
569            Agro-Ecological Zone of Southeastern Nigeria. *World J Agric Sci* 2010; **6**: 141–148.
- 570    12    Smith R, Cahn M, Daugovish O *et al.* Leaf Lettuce Production in California. Davis, CA, 2011  
571            doi:10.3733/ucanr.7216.
- 572    13    Tudela JA, Hernández N, Pérez-Vicente A, Gil MI. Growing season climates affect quality of fresh-cut  
573            lettuce. *Postharvest Biol Technol* 2017; **123**: 60–68.
- 574    14    Galinato SP, Miles CA. Economic profitability of growing lettuce and tomato in western washington  
575            under high tunnel and open-field production systems. *Horttechnology* 2013; **23**: 453–461.
- 576    15    Moniruzzaman M. Effects of Plant Spacing and Mulching on Yield and Profitability of Lettuce  
577            (*Lactuca sativa* L .). *J Agric Rural Dev* 2006; **4**: 107–111.
- 578    16    Mulderij R. OVERVIEW GLOBAL LETTUCE MARKET. Tholen,  
579            2016<http://www.freshplaza.com/article/163938/OVERVIEW-GLOBAL-LETTUCE-MARKET>.
- 580    17    UN Food & Agriculture Organization SD (FAOSTAT). Lettuce (with chicory) production in 2016 in the  
581            UK. FAOSTAT. 2017.<http://www.fao.org/faostat/en/#data/QC> (accessed 6 Jun2018).
- 582    18    Michelmores RW, Ochoa OE, Truco MJ, Grube R, Hayes R. Breeding crisphead lettuce. Davis, CA,  
583            2005.
- 584    19    Maas AL, Hannun AY, Ng AY. Rectifier Nonlinearities Improve Neural Network Acoustic Models  
585            Andrew. In: *Proceedings of the International Conference on Machine Learning*. ICML: Atlanta, Georgia,  
586            2013, pp 3–9.
- 587    20    Shukla M, Jharkharia S. *Agri-fresh produce supply chain management: A state-of-the-art literature*  
588            *review*. 2013 doi:10.1108/01443571311295608.
- 589    21    Lamsal K, Jones PC, Thomas BW. Harvest logistics in agricultural systems with multiple, independent  
590            producers and no on-farm storage. *Comput Ind Eng* 2016; **91**: 129–138.
- 591    22    Tibbits T, Morgan D, Warrington I. Growth of lettuce, spinach, mustard and wheat plants under four  
592            combinations of high-pressure sodium, metal halide, and tungsten halogen lamps at equal PPFD. *J Amer*  
593            *Soc Hort Sci* 1983; **108**: 622–630.

- 594 23 Schiefer G. New technologies and their impact on the agri-food sector: An economists view. *Comput*  
595 *Electron Agric* 2004; **43**: 163–172.
- 596 24 Tester M, Langridge P. Breeding Technologies to Increase Crop Production in a Changing World.  
597 *Science (80- )* 2010; **327**: 818–822.
- 598 25 Bosona T, Gebresenbet G. Food traceability as an integral part of logistics management in food and  
599 agricultural supply chain. *Food Control* 2013; **33**: 32–48.
- 600 26 Erhan D, Courville A, Vincent P. Why Does Unsupervised Pre-training Help Deep Learning? *J Mach*  
601 *Learn Res* 2010; **11**: 625–660.
- 602 27 Rubinstein R, Elad M. Dictionary learning for analysis-synthesis thresholding. *IEEE Trans Signal*  
603 *Process* 2014; **62**: 5962–5972.
- 604 28 BurrIDGE J, Jochua CN, Bucksch A, Lynch JP. Legume shovelomics: High-Throughput phenotyping of  
605 common bean (*Phaseolus vulgaris* L.) and cowpea (*Vigna unguiculata* subsp. *unguiculata*) root  
606 architecture in the field. *F Crop Res* 2016; **192**: 21–32.
- 607 29 Bradley D, Xu P, Mohorianu I-I *et al.* Evolution of flower color pattern through selection on regulatory  
608 small RNAs. *Science (80- )* 2017; **358**: 925–928.
- 609 30 Angermueller C, Pärnamaa T, Parts L, Stegle O. Deep learning for computational biology. *Mol Syst Biol*  
610 2016; **12**: 878.
- 611 31 Ma C, Zhang HH, Wang X. Machine learning for Big Data analytics in plants. *Trends Plant Sci* 2014;  
612 **19**: 798–808.
- 613 32 CIOU KJ, KURGAN LA, REFORMAT M. Machine Learning in the Life Sciences. *IEEE Eng Med Biol*  
614 *Mag* 2007; **26**: 27–36.
- 615 33 Libbrecht MW, Noble WS. Machine learning applications in genetics and genomics. *Nat Rev Genet*  
616 2015; **16**: 321–332.
- 617 34 Märtens K, Hallin J, Warringer J, Liti G, Parts L. Predicting quantitative traits from genome and  
618 phenome with near perfect accuracy. *Nat Commun* 2016; **7**. doi:10.1038/ncomms11512.
- 619 35 Simms DM, Waine TW, Taylor JC, Juniper GR. The application of time-series MODIS NDVI profiles  
620 for the acquisition of crop information across Afghanistan. *Int J Remote Sens* 2014; **35**: 6234–6254.
- 621 36 Reza AM. Realization of the contrast limited adaptive histogram equalization (CLAHE) for real-time  
622 image enhancement. *J VLSI Signal Process Syst Signal Image Video Technol* 2004; **38**: 35–44.
- 623 37 Pound MP, Atkinson JA, Townsend AJ *et al.* Deep machine learning provides state-of-the-art

- 624 performance in image-based plant phenotyping. *Gigascience* 2017; **6**: 1–10.
- 625 38 Rosebrock A. *Deep Learning for Computer Vision with Python*. 2017
- 626 doi:10.1017/CBO9781107415324.004.
- 627 39 Krizhevsky A, Hinton GE. ImageNet Classification with Deep Convolutional Neural Networks. In:
- 628 *Advances in neural information processing systems*. Neural Information Processing Systems (NIPS),
- 629 2012, pp 1097–1105.
- 630 40 Choromanska A, Henaff M, Mathieu M, Arous G Ben, LeCun Y. The Loss Surface of Multilayer
- 631 Networks. *arXiv14120233 [cs]* 2014.
- 632 41 Matsugu M, Mori K, Mitari Y, Kaneda Y. Subject independent facial expression recognition with robust
- 633 face detection using a convolutional neural network. *Neural Networks* 2003; **16**: 555–559.
- 634 42 Neubeck A, Van Gool L. Efficient non-maximum suppression. *Proc - Int Conf Pattern Recognit* 2006; **3**:
- 635 850–855.
- 636 43 Hazan E. Introduction to Online Convex Optimization. *Found Trends Optim* 2015; **2**: 151–166.
- 637 44 Trout TJ, Johnson LF, Gartung J. Remote sensing of canopy cover in horticultural crops. *HortScience*
- 638 2008; **43**: 333–337.
- 639 45 Hunter JD. Matplotlib: A 2D Graphics Environment. *Comput Sci Eng* 2007; **9**: 90–95.
- 640 46 Furbank RT, Tester M, Berry S *et al*. Phenomics – technologies to relieve the phenotyping bottleneck.
- 641 *Trends Plant Sci* 2011; **16**: 635–644.
- 642 47 Rousseau D, Dee H, Pridmore T. Imaging Methods for Phenotyping of Plant Traits. In: Kumar S (ed).
- 643 *Phenomics in Crop Plants: Trends, Options and Limitations*. Springer India, 2015, pp 61–74.
- 644 48 Tsaftaris SA, Minervini M, Scharf H. Machine Learning for Plant Phenotyping Needs Image Processing.
- 645 *Trends Plant Sci* 2016; **21**: 989–991.
- 646 49 Tardieu F, Cabrera-Bosquet L, Pridmore T, Bennett M. Plant Phenomics, From Sensors to Knowledge.
- 647 *Curr Biol* 2017; **27**: R770–R783.
- 648 50 Roy J, Tardieu F, Tixier-Boichard M, Schurr U. European infrastructures for sustainable agriculture.
- 649 *Nat Plants* 2017; **3**: 756–758.
- 650 51 Shen D, Wu G, Suk H-I. Deep Learning in Medical Image Analysis. *Annu Rev Biomed Eng* 2017; **19**:
- 651 221–248.
- 652 52 ZHOU J, Tardieu F, Pridmore T *et al*. Plant phenomics: history, present status and challenges. *J Nanjing*
- 653 *Agric Univ* 2018; **41**: 580–588.

- 654 53 Bongiovanni R, Lowenberg-deboer J. Precision Agriculture and Sustainability. *Precis Agric* 2004; **5**:  
655 359–387.
- 656 54 Burkart A, Hecht VL, Kraska T, U. R. Phenological analysis of unmanned aerial vehicle based time  
657 series of barley imagery with high temporal resolution. *Precis Agric* 2017; : 1–13.
- 658 55 Ramesh B, Cao L, Mohan K, Xu P. Can distributed software development be agile? *Commun ACM*  
659 2006; **49**: 41.
- 660 56 Reynolds D, Baret F, Welcker C *et al*. What is cost-efficient phenotyping? Optimizing costs for  
661 different scenarios. *Plant Sci* 2018; **July**. doi:10.1016/j.plantsci.2018.06.015.
- 662 57 Singh A, Ganapathysubramanian B, Singh AK, Sarkar S. Machine Learning for High-Throughput Stress  
663 Phenotyping in Plants. *Trends Plant Sci* 2016; **21**: 110–124.
- 664 58 Pedregosa F, Varoquaux G, Gramfort A *et al*. Scikit-learn: Machine Learning in Python. *J Mach Learn*  
665 *Res* 2011; **12**: 2825–2830.
- 666 59 Howse J. *OpenCV Computer Vision with Python*. 1st ed. Packt Publishing Ltd.: Birmingham, UK, 2013.
- 667 60 van der Walt S, Schönberger JL, Nunez-Iglesias J *et al*. Scikit-image: image processing in Python.  
668 *PeerJ* 2014; **2**: 1–18.
- 669 61 Liu S, Baret F, Andrieu B, Burger P, Hemmerlé M. Estimation of Wheat Plant Density at Early Stages  
670 Using High Resolution Imagery. *Front Plant Sci* 2017; **8**: 1–10.
- 671 62 Frasconi C, Raffaelli M, Emmi L, Fontanelli M, Martelloni L, Peruzzi A. An automatic machine able to  
672 perform variable rate application of flame weeding: Design and assembly. *Chem Eng Trans* 2017; **58**:  
673 301–306.
- 674 63 Brann D, Specialist EG, Sciences SE, Tech V. A Comprehensive Approach Precision Farming :  
675 Management is the KEY. *Virginia Coop Ext* 2009.

676

## 677 **Figures**

678 **Figure 1: Ultra-large NDVI aerial imaging accomplished routinely through a fixed-wing light**  
679 **aircraft operated by G’s Growers.**

680 **(A)** The flying route and aerial imaging were designed to facilitate cross-site crop layout assessment  
681 and yield prediction. **(B)** A series of ultra-large NDVI images at 3cm GSD spatial resolution were  
682 acquired to record 0.8-1.6 million lettuce heads per field, at H1 and H2 stages.

683

684 **Figure 2: A high-level analysis workflow of AirSurf-Lettuce.**

685 (A) Step 1 accepts raw NDVI images as input imagery data (pixels with extremely high NDVI signals  
686 are overflowed). (B) Step 2 pre-processes the raw NDVI images to calibrate intensity distribution and  
687 correct overflowing pixels. (C&D) Step 3 carries out ML-based traits analyses to quantify lettuce  
688 number and classify head size across a given NDVI image. (E) Steps 4&5 visualise and export  
689 statistics of the traits analyses detection, including yield-related phenotypes such as lettuce counting,  
690 size distribution, and harvest regions, and associated GPS coordinates.

691

692 **Figure 3: A CNN-based learning architecture established for lettuce counting.**

693 (A) The architecture of the trained CNN model, which generates a binary output representing the  
694 probability of whether a yellow bounding box contains a lettuce signal. (B) If the probability is close  
695 to 1.0, it indicates that it is highly likely that the bounding box encloses a lettuce. (C) The training and  
696 validation accuracy and loss curves of the model.

697

698 **Figure 4: The improved results of the CNN model and the size classification of lettuce heads.**

699 (A) Wrongly detected lettuces in very bright regions and overly counted lettuces in very dark regions,  
700 in a one-million-head field. (B) Enhanced training datasets to retrain the model using the online-  
701 learning approach, which led to much better detection results. (C) A predefined colour code (small is  
702 coloured blue, medium is coloured green, and large is coloured red) is assigned to each recognised  
703 lettuce head across the field.

704

705 **Figure 5: A GPS-based harvest map based on lettuce size classification.**

706 (A) A colour-coded lettuce size distribution map. (B) The field is segmented into thousands of grids  
707 based on the optimal GPS resolution and the size of the harvester machinery. (C) Grids are coloured  
708 with the most representative lettuce size category across the image, representing harvest regions of the  
709 whole field.

710

711 **Figure 6: 3D visualisation of lettuce harvest regions.**

712 (A) AirSurf-L reads an NDVI image and exports a lettuce size distribution map. (B) 3D visualising  
713 GPS-based field grids to represent the number of lettuces, representative size categories. (C) A  
714 dynamic 3D bar chart is generated to present the relationship between lettuce number, infield layout,  
715 and the representative lettuce size.

716

717 **Figure 7: Applying AirSurf-Lettuce to count and classify millions of lettuce heads in three**  
718 **plantation fields across the Cambridgeshire, UK.**

719 (A-C) AirSurf-Lettuce is applied to count and classify millions of lettuce heads in three plantation  
720 fields in the Cambridgeshire, UK.

721

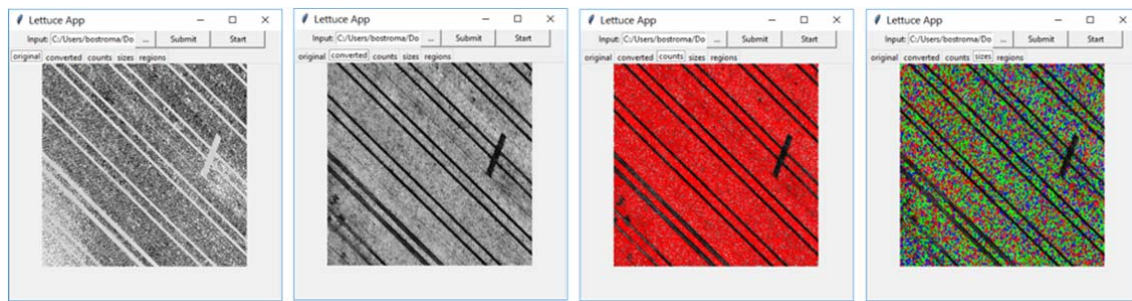

722

723 **Supplementary Figure 1: The GUI interface of AirSurf-Lettuce and the analysis workflow.**

724

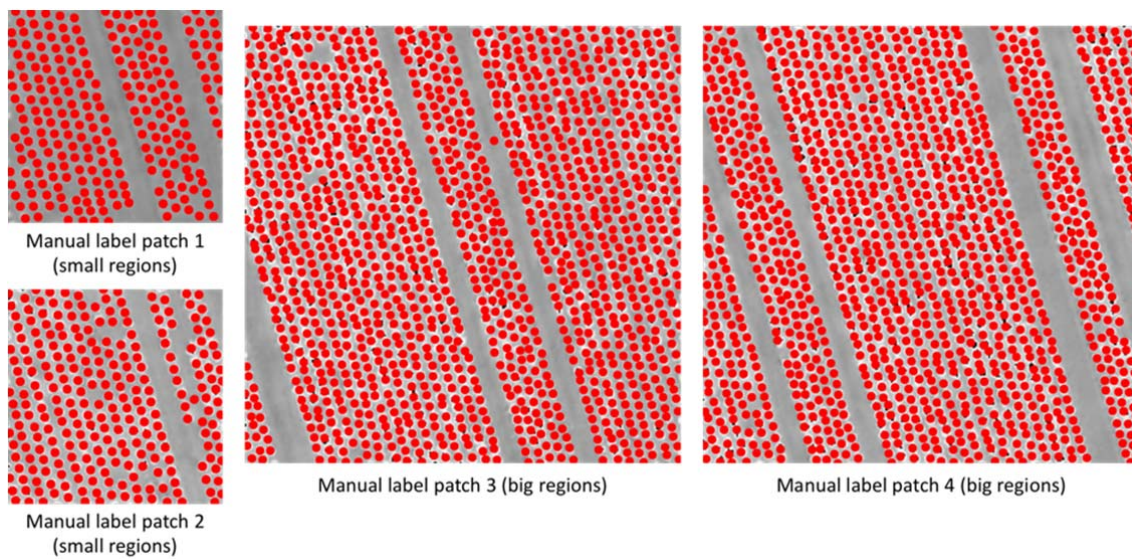

725

726 **Supplementary Figure 2: Manually labelled lettuces in randomly selected patches using red dots.**

727

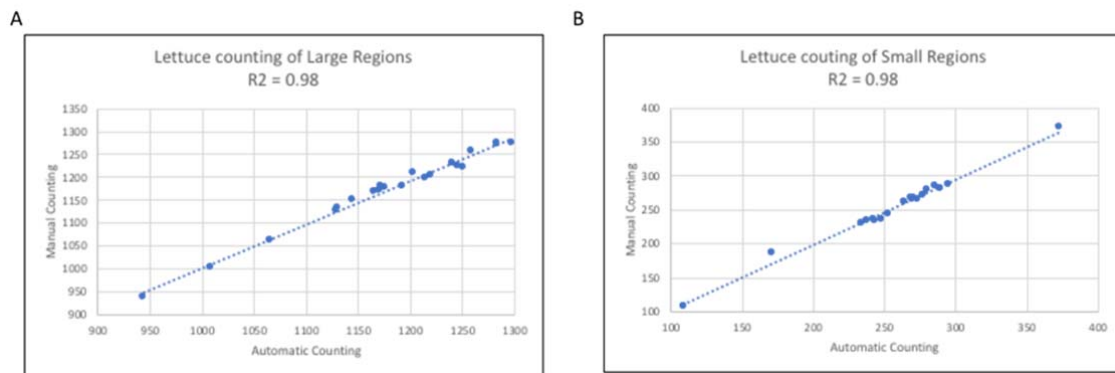

728

729 **Supplementary Figure 3: The correlation between human counting and AirSurf-L scoring ( $R^2 =$**

730 **0.98).**

731

A

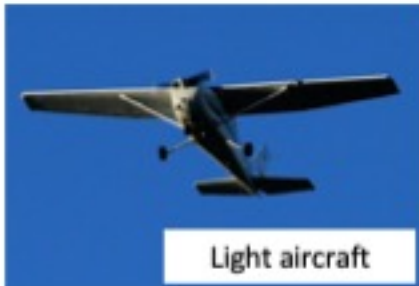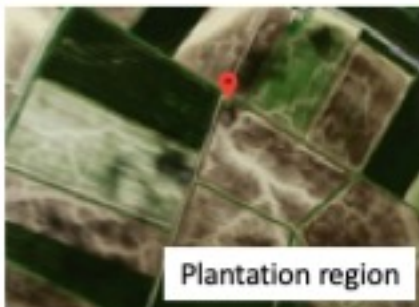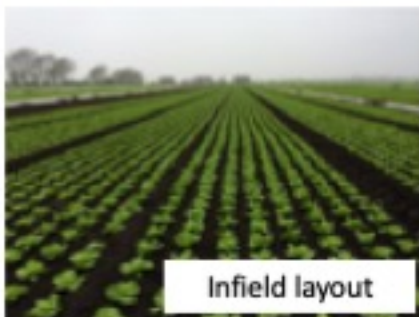

B

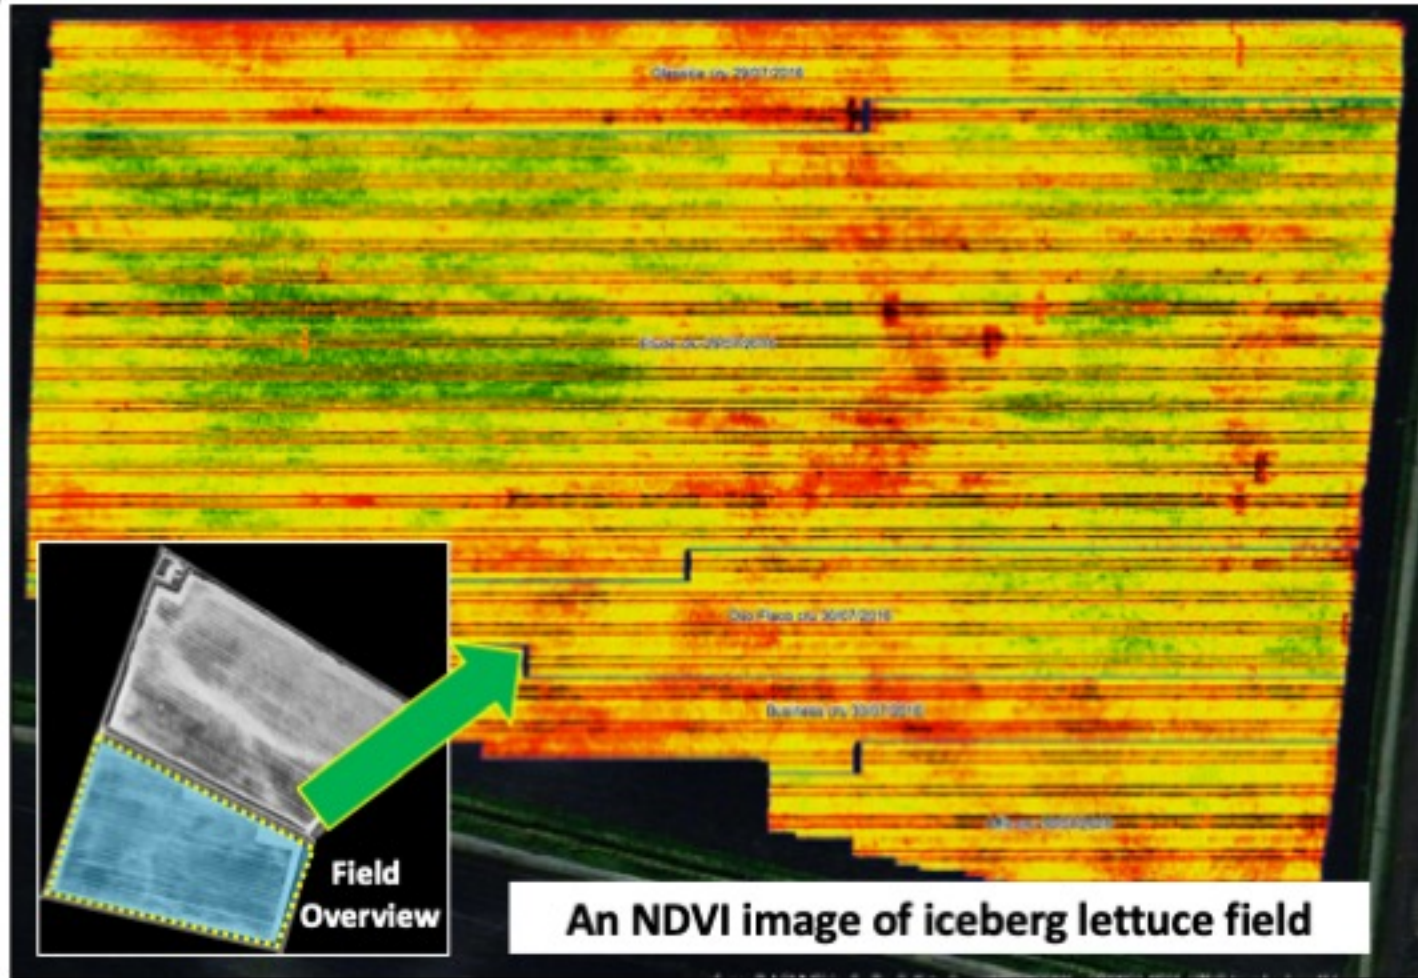

Fig. 1



Fig. 2

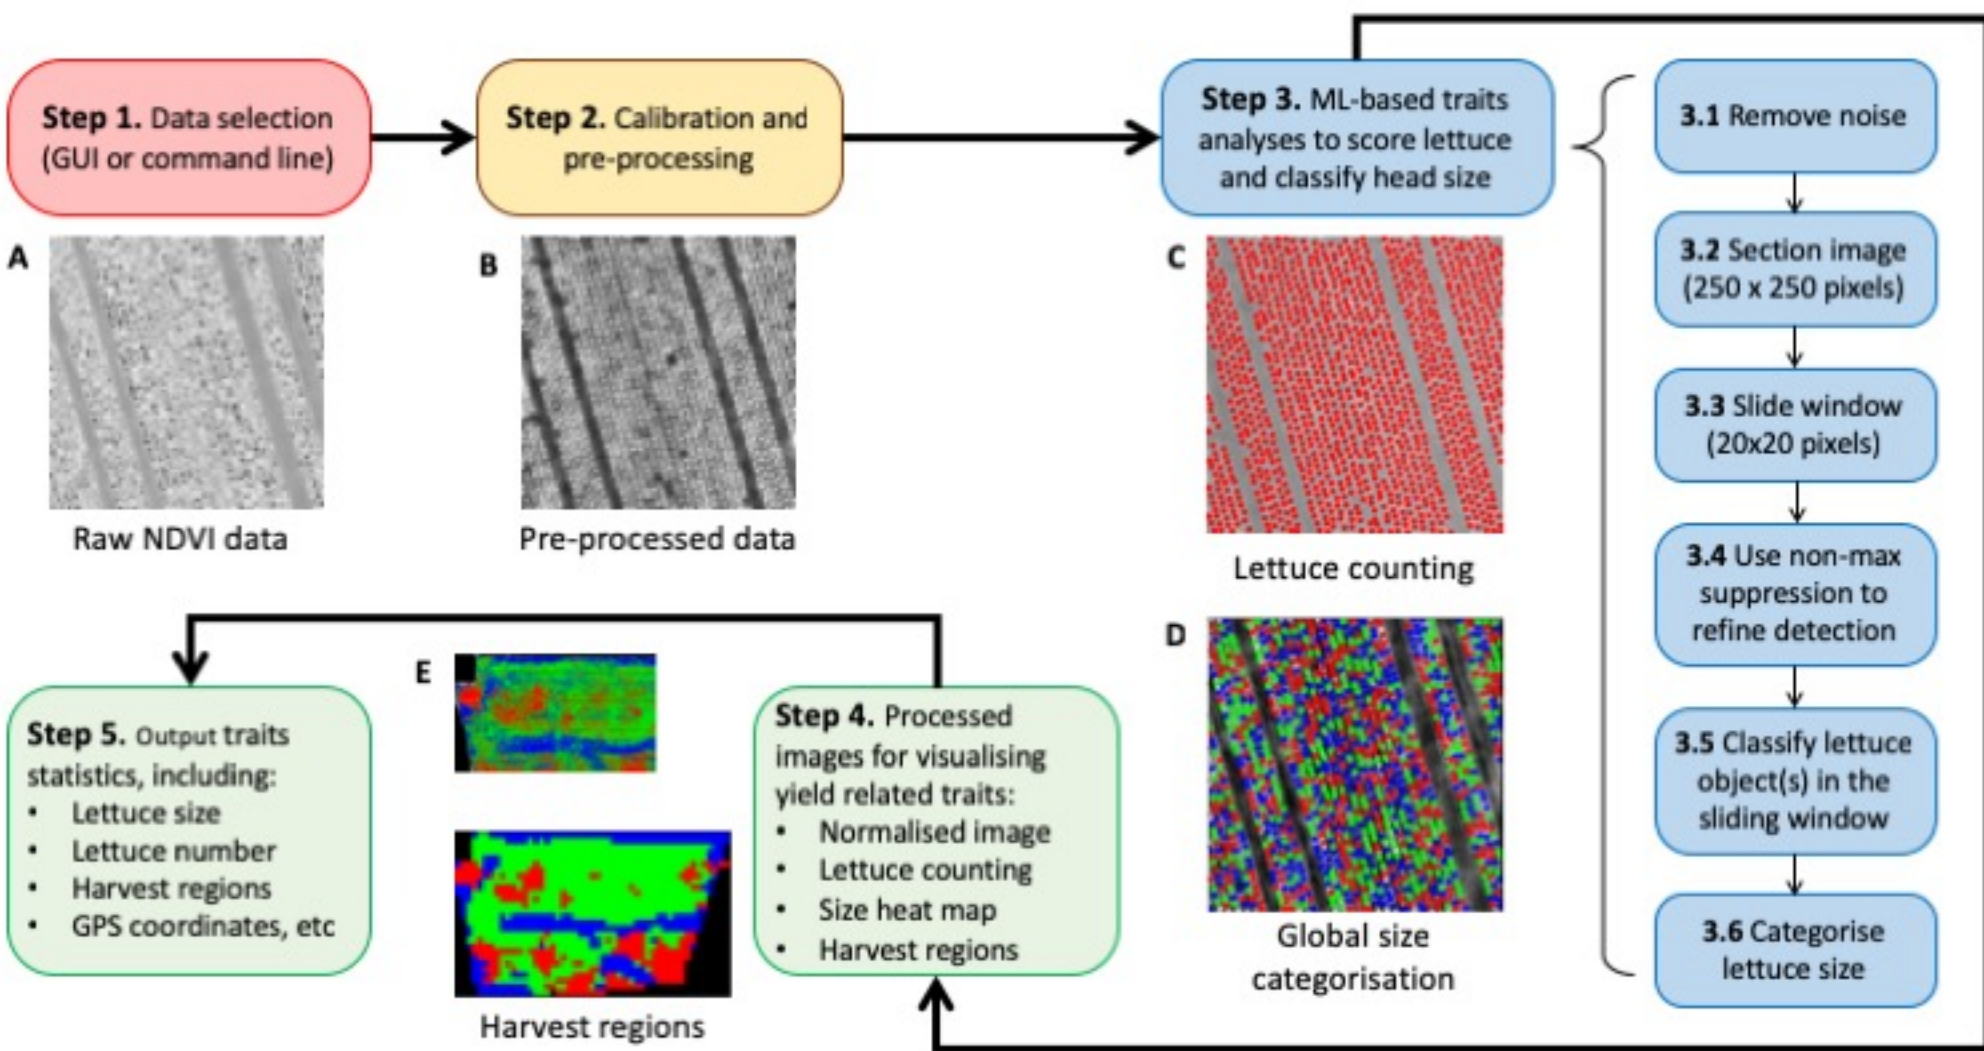

A

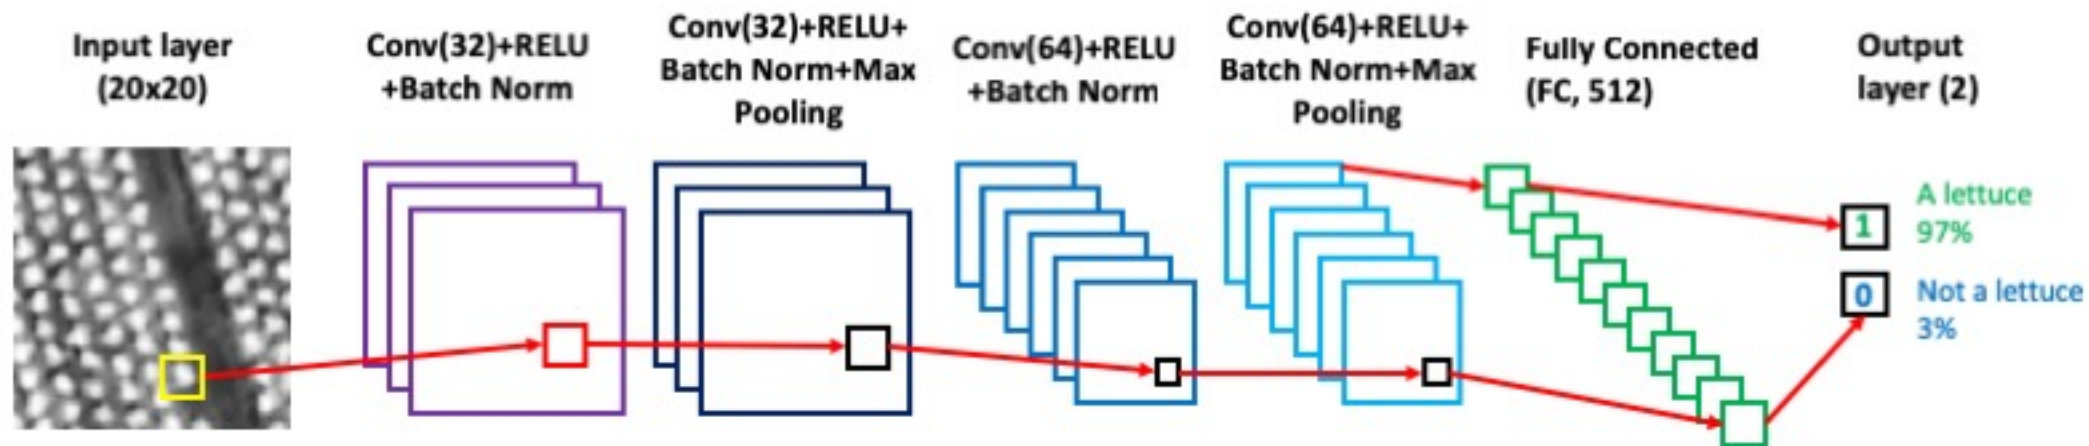

B

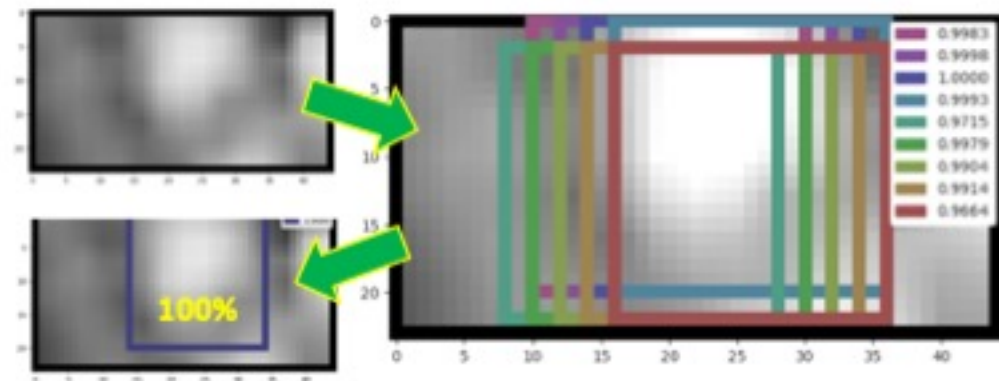

C

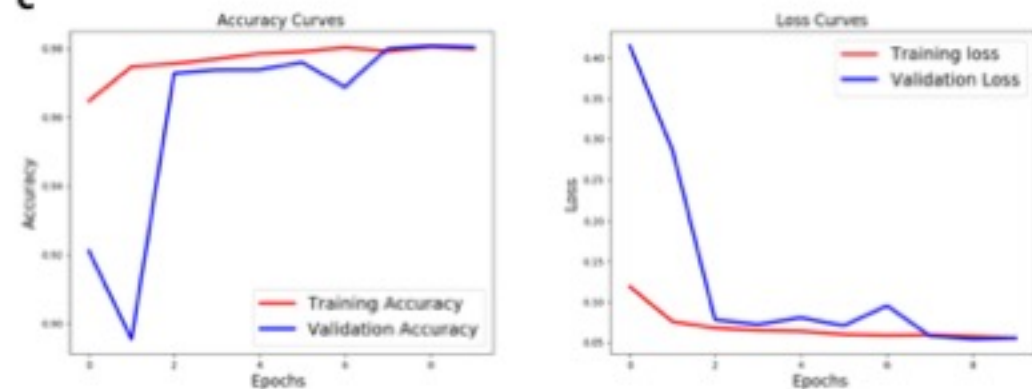

**Fig.4****A**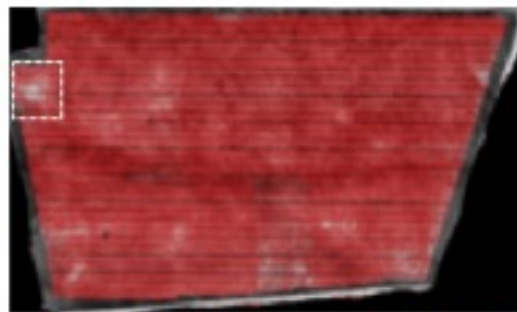**B**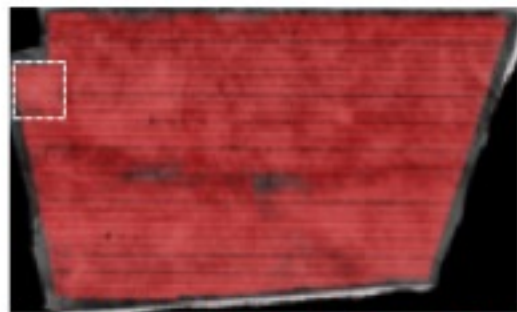**C**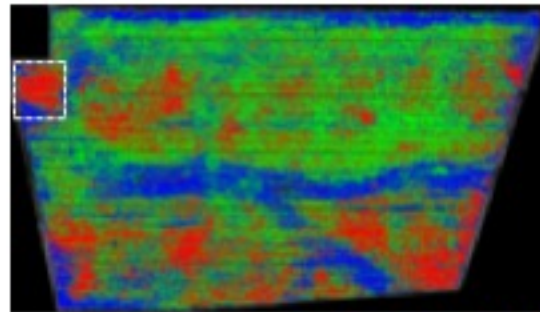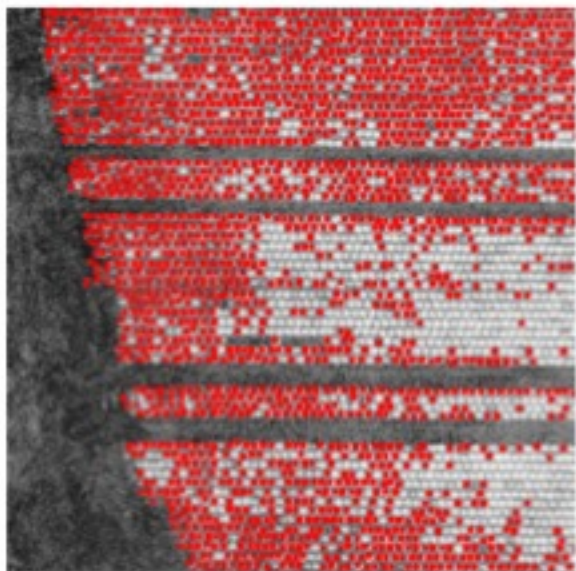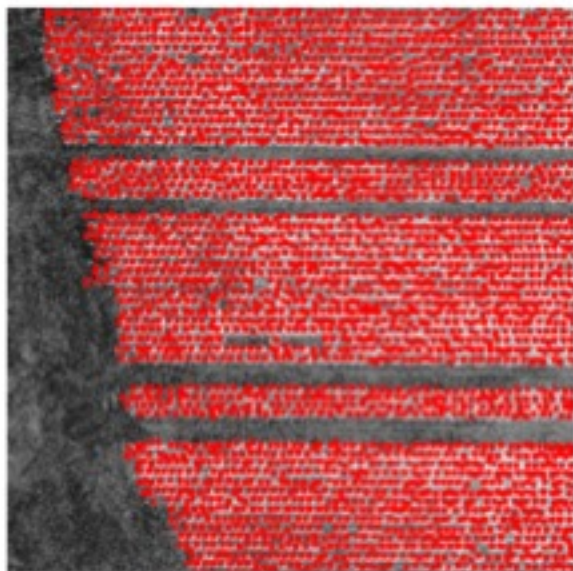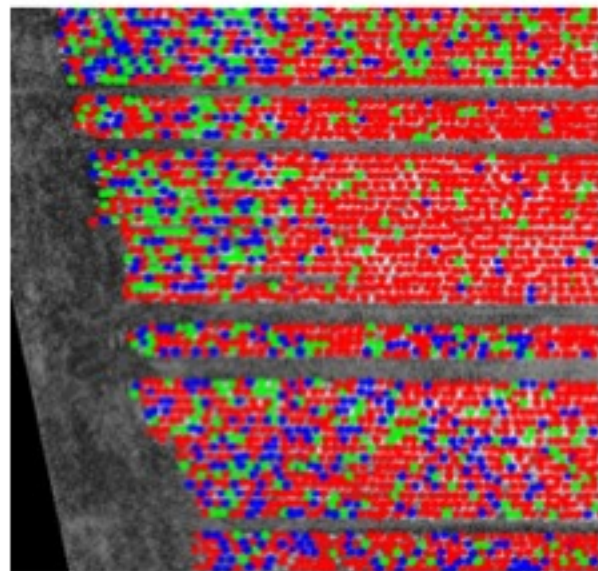

A

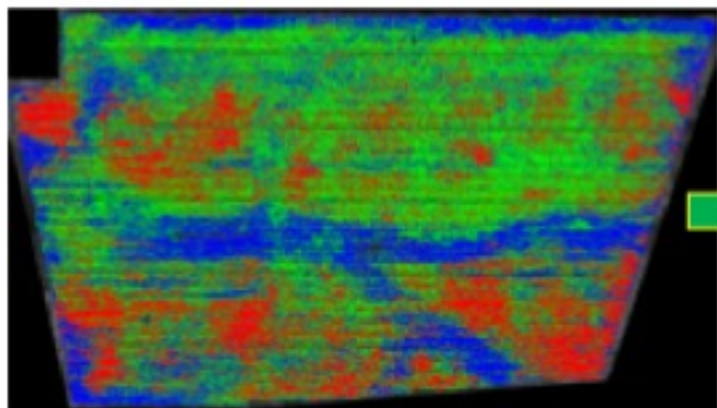

Lettuce size distribution map

B

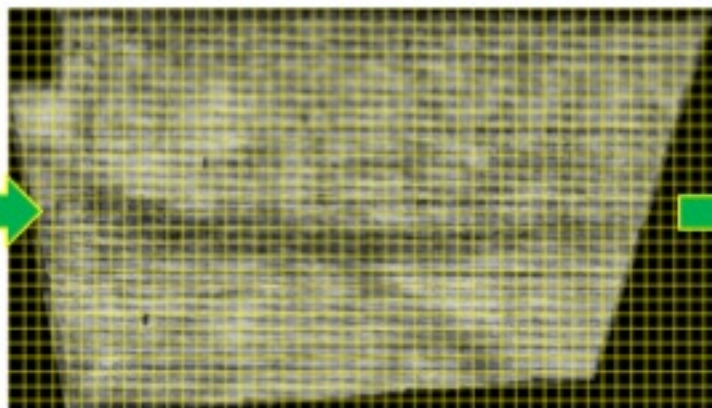

GPS-based field gridding

C

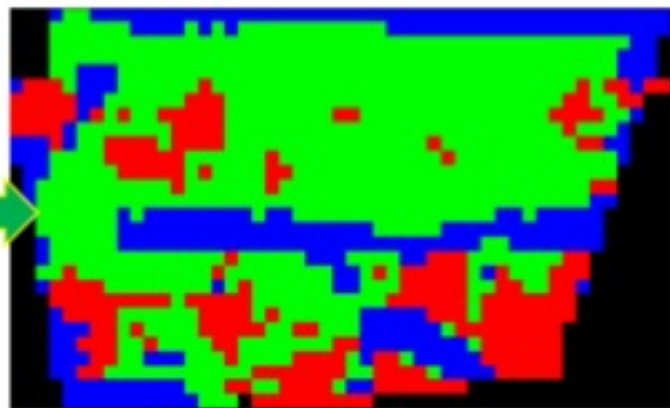

Harvest regions

A

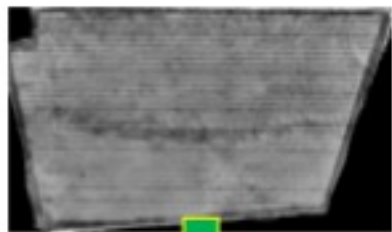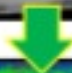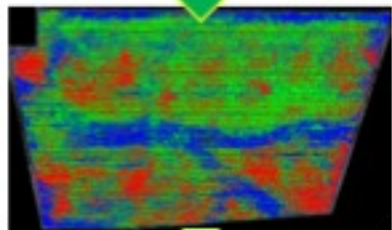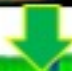

B

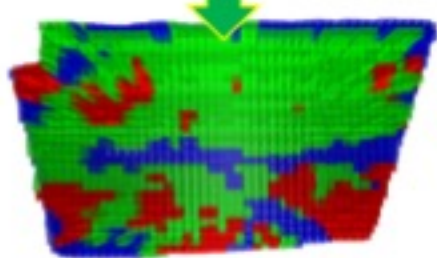

C

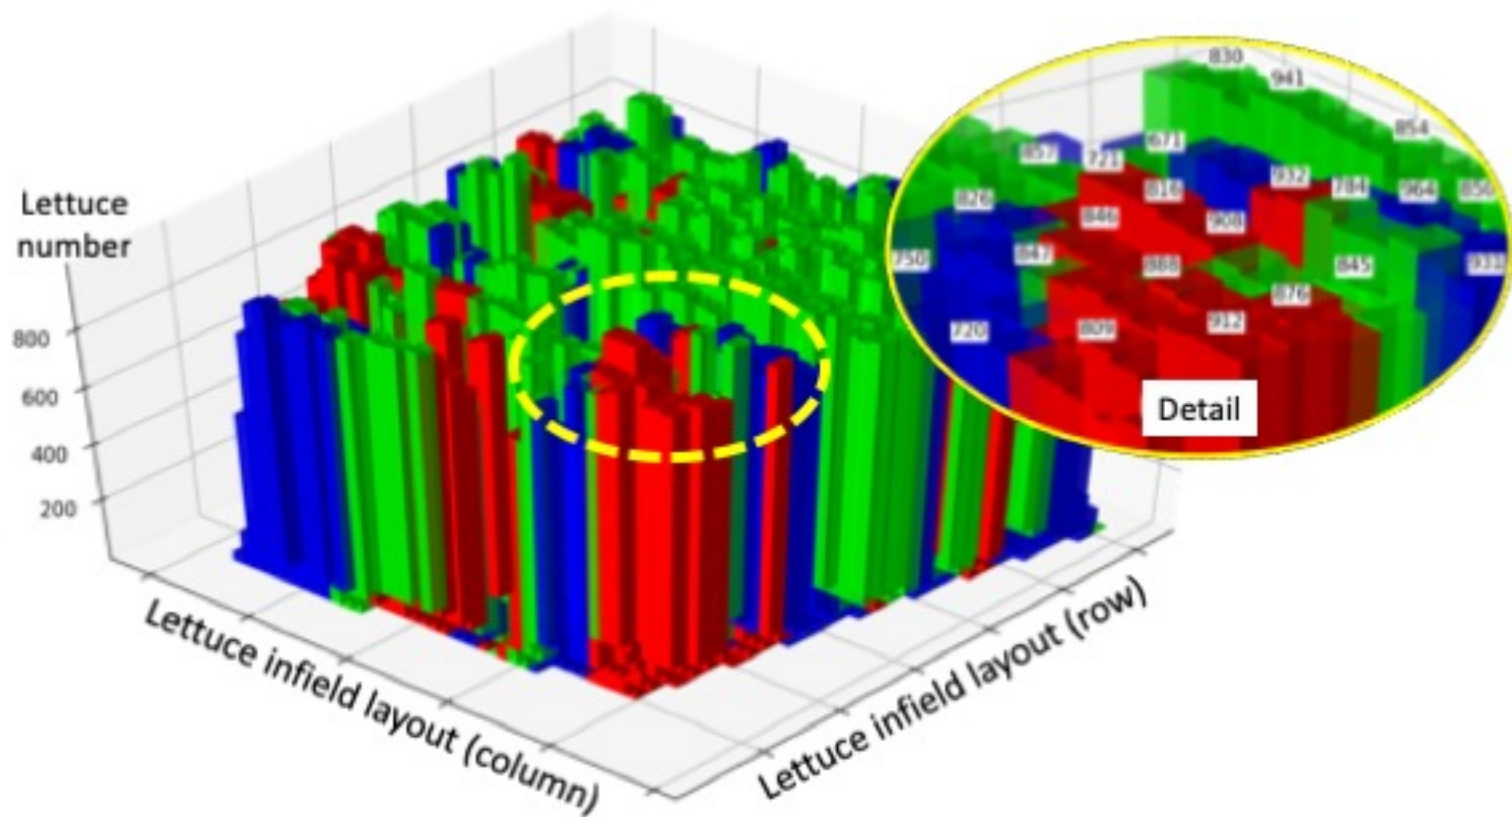

A

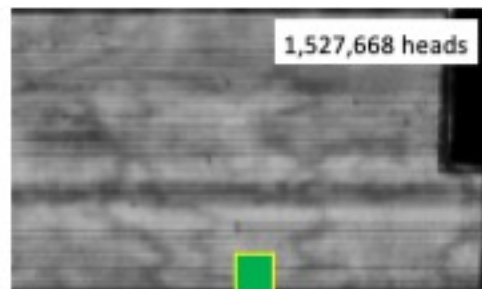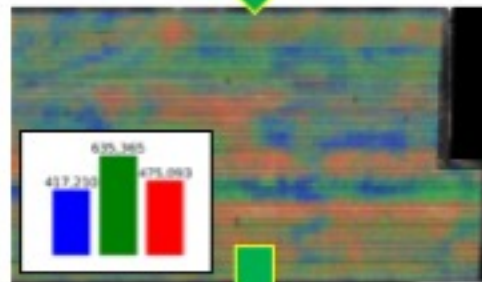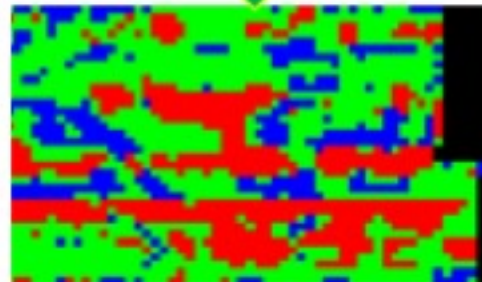

B

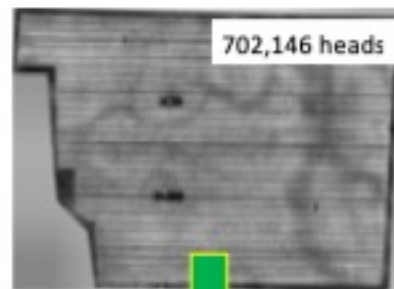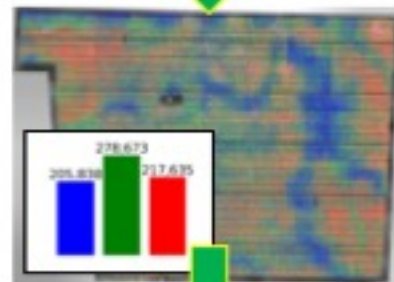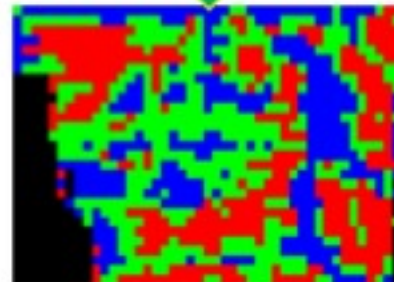

C

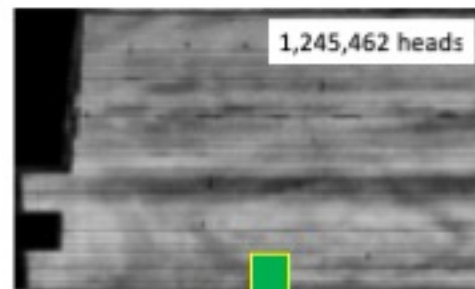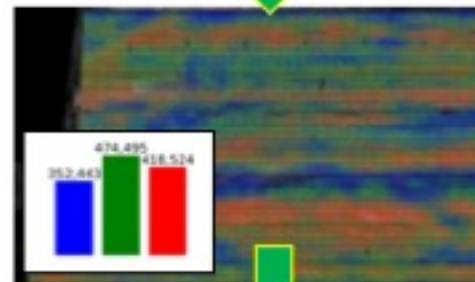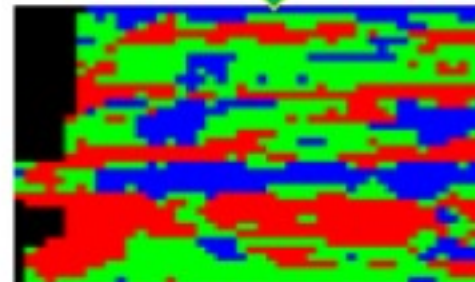

Source: https://www.biorxiv.org/content/biorxiv/early/2019/01/23/527184.full.pdf
